# Supplementary material for: From zinco(ii) arsaketenes to silylene-stabilised zinco arsinidene complexes
Source: Royal Society of Chemistry journal article supplement (doi:10.1039/c8cc01928b), 2018-01-01
Supplement: c8cc01928b1.pdf [file c8cc01928b1.pdf]

[Type text]

## Electronic Supplementary Information

### From zinco(II) arsaketenes to silylene-stabilised zinco arsinidene complexes

|                                                                                    |    |
|------------------------------------------------------------------------------------|----|
| 1. Experimental Section.....                                                       | 2  |
| 1.1. Synthesis and selected spectroscopic data of the compounds reported.....      | 2  |
| 1.1.1. Synthesis of LZnCl(NHC) ( <b>3</b> ).....                                   | 2  |
| 1.1.2. Synthesis of LZn(AsCO)( <sup>t</sup> PrNHC) ( <b>4</b> ).....               | 4  |
| 1.1.3. Synthesis of [NHC→ <sup>t</sup> BuNHSi→AsZnL] ( <b>5</b> ).....             | 6  |
| 1.1.4. Synthesis of [{ <sup>t</sup> BuNHSi→AsZnL} <sub>2</sub> ] ( <b>6</b> )..... | 8  |
| 1.1.5. Synthesis of [(DippNHSi)→AsZnL] ( <b>7</b> ) .....                          | 10 |
| 2. Crystallographic data.....                                                      | 12 |
| 2.1. Molecular structure of <b>3</b> .....                                         | 13 |
| 3. Computational data.....                                                         | 14 |
| 3.1. Compound [NHC→ <sup>t</sup> BuNHSi→AsZnL] ( <b>5</b> ).....                   | 14 |
| 3.2. Compound [{ <sup>t</sup> BuNHSi→AsZnL} <sub>2</sub> ] ( <b>6</b> ) .....      | 15 |
| 3.3. Compound [(DippNHSi)→AsZnL] ( <b>7</b> ) .....                                | 17 |
| 3.4. Optimized geometries for compounds <b>5-7</b> .....                           | 19 |
| 4. References.....                                                                 | 31 |

## 1. Experimental Section

**Materials and methods:** All manipulations were carried out using standard Schlenk and glovebox techniques under a dry atmosphere of nitrogen. The compounds LZnCl<sub>2</sub>Li(OEt<sub>2</sub>)<sub>2</sub> (**1**),<sup>1</sup> NaAsCO(dioxane)<sub>2,3</sub>,<sup>2</sup> [C(Me)N(<sup>*i*</sup>Pr)]<sub>2</sub>C: (NHC),<sup>3</sup> [C(H)N(<sup>*t*</sup>Bu)]<sub>2</sub>Si: (<sup>*t*</sup>BuNHSi),<sup>4</sup> and [C(H)N(2,6-<sup>*i*</sup>Pr<sub>2</sub>-C<sub>6</sub>H<sub>3</sub>)<sub>2</sub>Si: (DippNHSi)<sup>5</sup> were prepared according with the literature procedures. Ambient temperature is referred to an interval between 20 °C and 30 °C. Toluene, hexane, tetrahydrofuran, diethyl ether, THF-*d*<sub>8</sub> and C<sub>6</sub>D<sub>6</sub> were dried with the sodium-benzophenone mixture and stored under molecular sieves prior use. <sup>1</sup>H-, <sup>13</sup>C{<sup>1</sup>H}-, <sup>29</sup>Si{<sup>1</sup>H}- and 2D- NMR spectra were recorded with Bruker spectrometers AV200, AV400 and AV500. The spectra were referenced to SiMe<sub>4</sub> using the residual solvent signals as internal standards, or externally to SiMe<sub>4</sub> in the case of the <sup>29</sup>Si{<sup>1</sup>H}-NMR. Abbreviations: s = singlet; d = doublet; t = triplet; sept = septet; m = multiplet. IR spectra were measured from powder samples inside a nitrogen filled glovebox using a Thermofisher Nicolet iS5 IR Spectrometer (ATR-Diamond). Melting points were determined in sealed glass capillaries under nitrogen. Elemental analyses were performed by the analytical laboratory service in the Institute of Chemistry, Technical University of Berlin, Germany.

### 1.1. Synthesis and selected spectroscopic data of the compounds reported

#### 1.1.1. Synthesis of LZnCl(NHC) (**3**)

Compound **1** (1.68 g, 2.4 mmol), NHC (0.45 g, 2.5 mmol) and a magnetic stir bar were mixed in a 100 mL Schlenk flask in the glovebox. To this mixture, toluene at -78 °C (50 mL) was added. The resulting suspension was stirred and warmed up to ambient temperature in an 18 h period. The mixture was cannula filtered and the solvent was removed under vacuum. The residual white solid was washed with Et<sub>2</sub>O (1 x 4 mL), hexane (1 x 4 mL) and dried under vacuum. Yield: 1.00 g (60 %), m.p. 252 °C. Single crystals suitable for X-ray diffraction analysis were obtained from a saturated solution of **3** in toluene at ambient temperature after 18 hours. Elemental analysis calcd (%) for C<sub>40</sub>H<sub>61</sub>N<sub>4</sub>ClZn: C 68.75, H 8.80, N 8.02; found: C 69.37, H 9.20, N 8.28. <sup>1</sup>H NMR (THF-*d*<sub>8</sub>, 500 MHz, 298 K): δ (ppm) = 0.63 (d, <sup>3</sup>J<sub>HH</sub> = 6.7 Hz, 6H, L-<sup>*i*</sup>Pr-CH<sub>3</sub>), 1.98 (d, <sup>3</sup>J<sub>HH</sub> = 6.8 Hz, 6H, L-<sup>*i*</sup>Pr-CH<sub>3</sub>), 1.11 (d, <sup>3</sup>J<sub>HH</sub> = 6.8 Hz, 6H, L-<sup>*i*</sup>Pr-CH<sub>3</sub>), 1.17 (d, <sup>3</sup>J<sub>HH</sub> = 7.0 Hz, 6H, NHC-<sup>*i*</sup>Pr-CH<sub>3</sub>), 1.33 (d, <sup>3</sup>J<sub>HH</sub> = 6.7 Hz, 6H, L-<sup>*i*</sup>Pr-CH<sub>3</sub>), 1.60 (d, <sup>3</sup>J<sub>HH</sub> = 6.8 Hz, 6H, NHC-<sup>*i*</sup>Pr-CH<sub>3</sub>), 1.67 (s, 6H, L-NCMe), 2.20 (s, 3H, NHC-NCMe), 2.34 (s, 3H, NHC-NCMe), 3.00 (sept, <sup>3</sup>J<sub>HH</sub> = 6.8 Hz, 2H, L-<sup>*i*</sup>Pr-CH), 3.57 (sept, <sup>3</sup>J<sub>HH</sub> = 6.7 Hz, 2H, L-<sup>*i*</sup>Pr-CH), 4.85 (s, 1H, L-NCCHCN), 5.28 (sept, <sup>3</sup>J<sub>HH</sub> = 6.7 Hz, 1H, NHC-<sup>*i*</sup>Pr-CH), 6.12 (sept, <sup>3</sup>J<sub>HH</sub> = 7.0 Hz, 1H, NHC-<sup>*i*</sup>Pr-CH), 6.92-7.10 (m, 6 H, *m* and *p* ArH). <sup>13</sup>C{<sup>1</sup>H}-NMR (THF-*d*<sub>8</sub>, 125 MHz, 298 K): δ (ppm) = 10.54 and 10.61 (NHC-CMe), 22.19 and 23.17 (NHC-<sup>*i*</sup>Pr-CH<sub>3</sub>), 24.55 (L-NCMe), 24.76, 25.10, 25.20 and 25.51 (L-<sup>*i*</sup>Pr-CH<sub>3</sub>) 27.72 and 29.01 (L-<sup>*i*</sup>Pr-CH), 51.90 and 54.32 (NHC-<sup>*i*</sup>Pr-CH), 94.12 (L-NCCHCN), 123.48, 124.48 and 125.22 (L *m* and *p* -ArC), 126.89 and

[Type text]

127.89 (L *o*-ArC), 142.71 and 144.54 (NHC -NMe), 146.34 (L *i*-ArC), 167.58 (L-NCCHCN), 176.78 (NHC-NC:N).

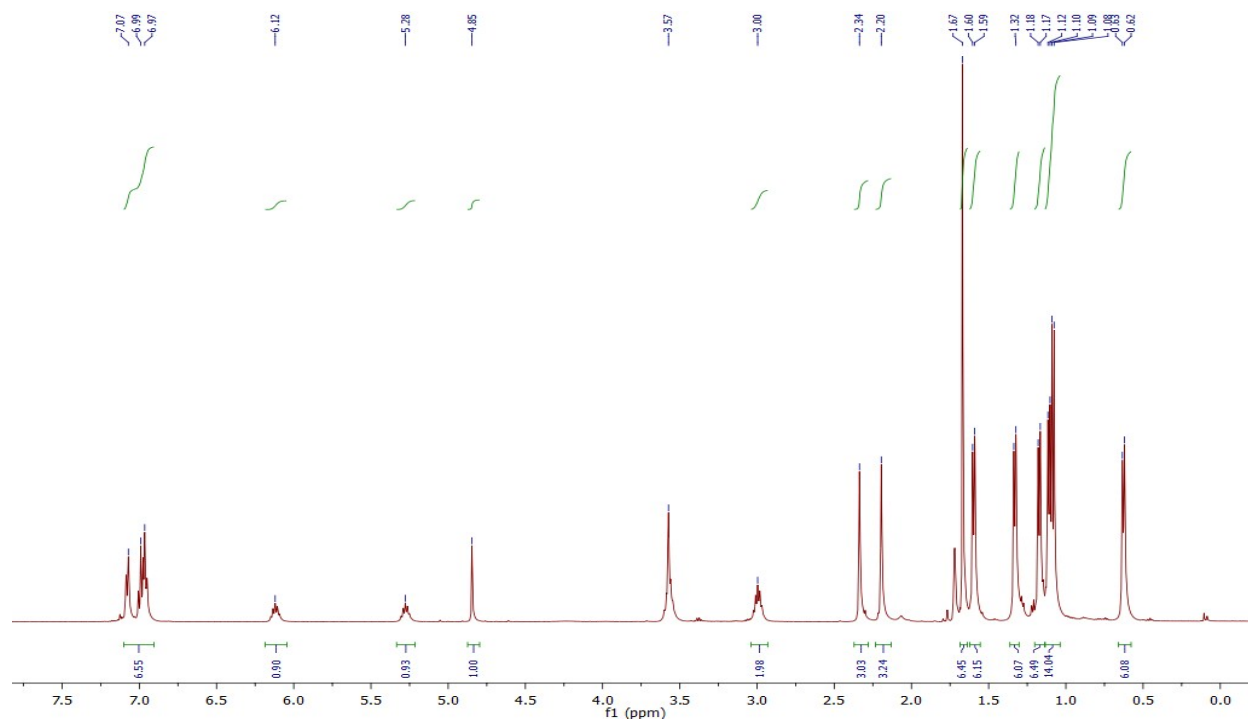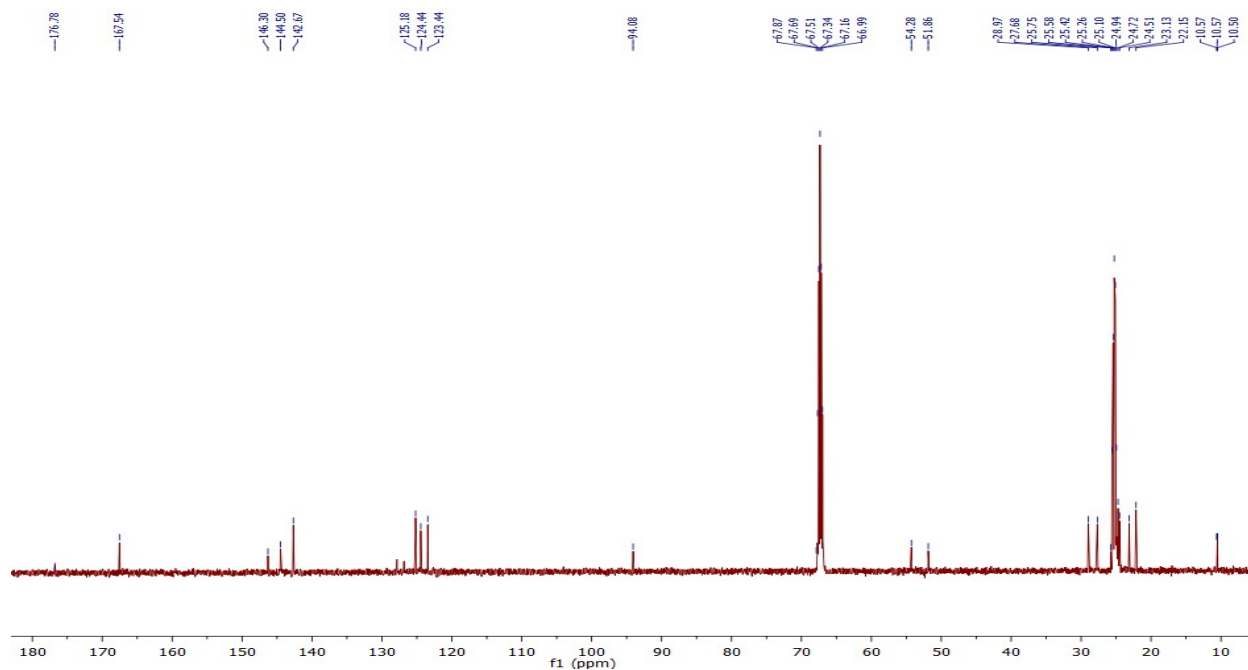

[Type text]

### 1.1.2. Synthesis of LZn(AsCO)(*i*PrNHC) (4)

A THF (30 mL) solution of **3** (1.80 g, 2.6 mmol) at ambient temperature was added dropwise over a THF (30 mL) solution of NaAsCO(dioxane)<sub>2,3</sub> (0.93 g, 2.8 mmol, 1.1 eq.) precooled at -78 °C. The mixture was stirred and warm up to ambient temperature in two hours. After this, the mixture was a yellow solution mixed with a white solid. The volatiles were removed under vacuum. The remained yellow residue was extracted with Et<sub>2</sub>O (150 mL). This mixture was filtered over celite and the yellow solution was concentrated until incipient crystal formation; at this point, the mixture was kept at -28 °C for 40 hours. The crystalline solid was separated via Teflon-cannula filtration, washed with hexane (1 x 7 mL) and dried under vacuum. Yield: 0.60 g (30 %), m.p. 136 °C (d.). Elemental analysis calcd (%) for C<sub>41</sub>H<sub>61</sub>N<sub>4</sub>AsOZn: C 64.27, H 8.02, N 7.31; found: C 64.87, H 8.09, N 7.38. <sup>1</sup>H NMR (C<sub>6</sub>D<sub>6</sub>, 200 MHz, 298 K): δ (ppm) = 0.77 (d, <sup>3</sup>J<sub>HH</sub> = 6.8 Hz, 6H, NHC-*i*Pr-CH<sub>3</sub>), 1.09 (d, <sup>3</sup>J<sub>HH</sub> = 6.7 Hz, 6H, L-*i*Pr-CH<sub>3</sub>), 1.13 (d, <sup>3</sup>J<sub>HH</sub> = 6.9 Hz, 6H, L-*i*Pr-CH<sub>3</sub>), 1.32 (d, <sup>3</sup>J<sub>HH</sub> = 6.9 Hz, 12H, L-*i*Pr-CH<sub>3</sub>), 1.56 (s, 3H, NHC-NCMe), 1.69 (s, 6H, L-NCMe), 1.71 (s, 3H, NHC-NCMe), 1.76 (d, <sup>3</sup>J<sub>HH</sub> = 6.8 Hz, 6H, NHC-*i*Pr-CH<sub>3</sub>), 3.02 (sept, <sup>3</sup>J<sub>HH</sub> = 6.9 Hz, 2H, L-*i*Pr-CH), 3.87 (sept, <sup>3</sup>J<sub>HH</sub> = 6.8 Hz, 2H, L-*i*Pr-CH), 4.80 (s, 1H, L-NCCHCN), 5.35 (sept, <sup>3</sup>J<sub>HH</sub> = 6.9 Hz, 1H, NHC-*i*Pr-CH), 6.85 (sept, <sup>3</sup>J<sub>HH</sub> = 6.9 Hz, 1H, NHC-*i*Pr-CH), 7.04-7.34 (m, 6 H; *m* and *p* ArH). <sup>13</sup>C{<sup>1</sup>H}-NMR (C<sub>6</sub>D<sub>6</sub>, 50 MHz, 298 K): δ (ppm) = 177.29 (AsCO), 185.01 (free CO). IR(cm<sup>-1</sup>): 1862 (AsCO).

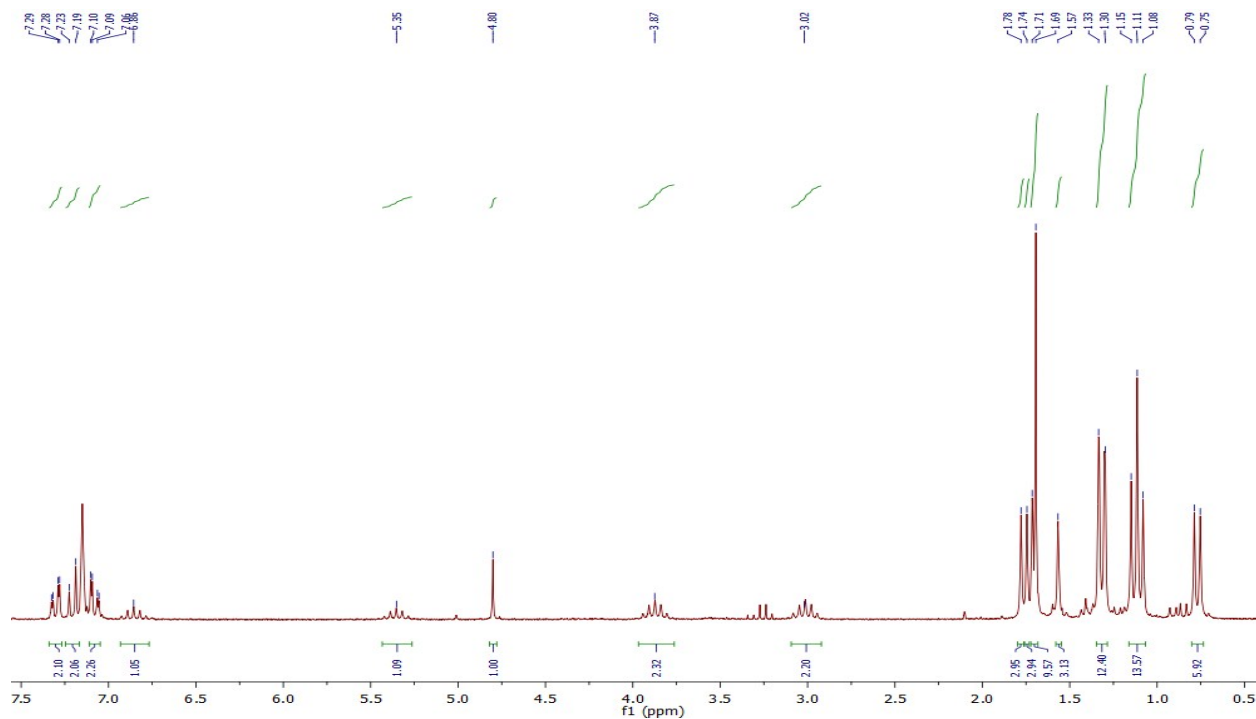

Figure S3. <sup>1</sup>H-NMR spectrum of **4** in C<sub>6</sub>D<sub>6</sub> at 298 K.

[Type text]

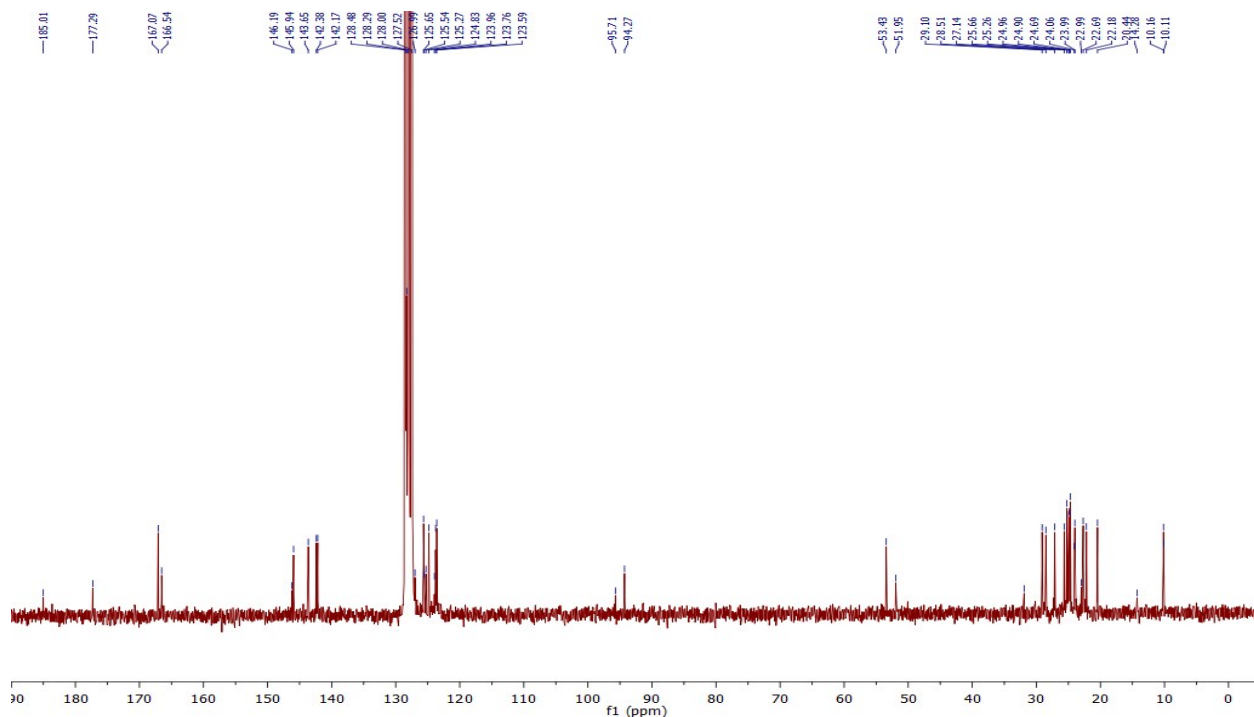

**Figure S4.**  $^{13}\text{C}\{^1\text{H}\}$ -NMR spectrum of **4** in  $\text{C}_6\text{D}_6$  at 298 K.

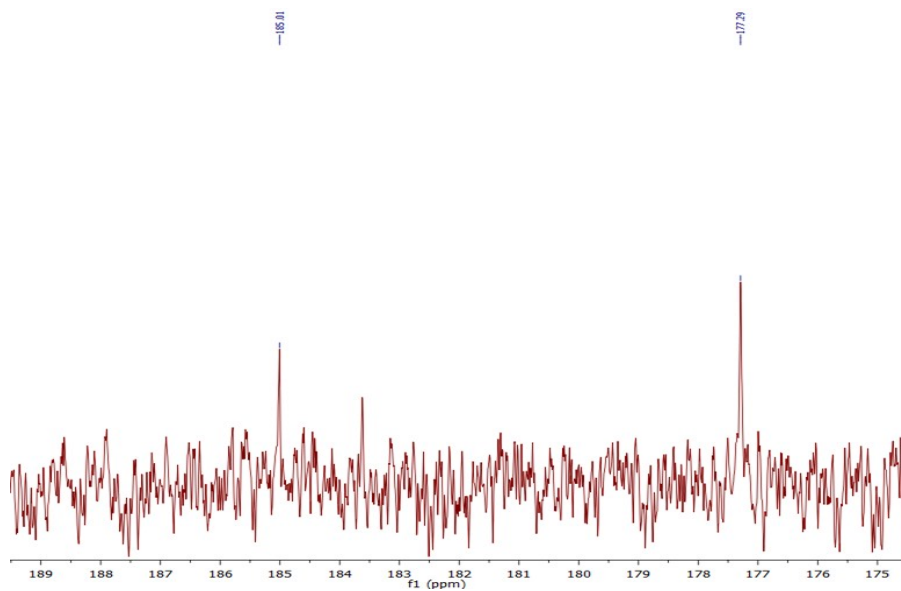

**Figure S5.** Amplified  $^{13}\text{C}\{^1\text{H}\}$ -NMR spectrum of **4** in  $\text{C}_6\text{D}_6$  at 298 K. There is CO in solution.

[Type text]

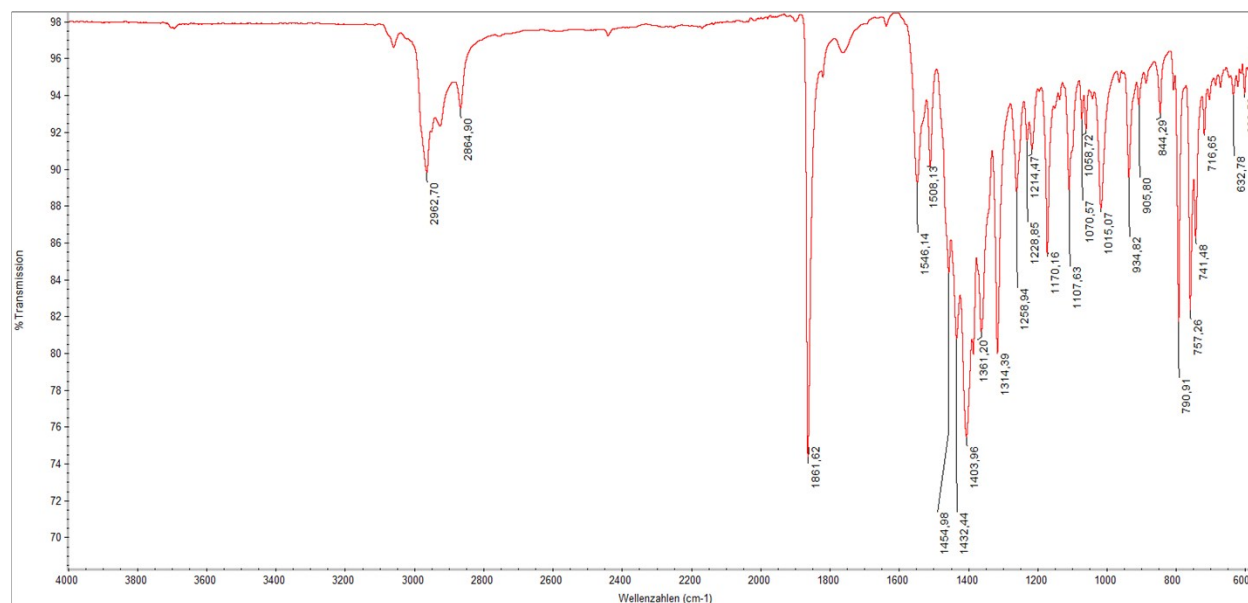

Figure S6. IR (ATR) spectrum of **4**.

### 1.1.3. Synthesis of [NHC→<sup>t</sup>BuNHSi→AsZnL] (**5**)

Compound **4** (0.19 g, 0.25 mmol), <sup>t</sup>BuNHSi (0.050 g, 0.25 mmol) and a magnetic stir bar were mixed in a 25 mL Schlenk flask in the glovebox. To this mixture, toluene at ambient temperature (10 mL) was added. The resulting yellow-orange solution was stirred at ambient temperature for two days. After this time, the mixture was a dark solution containing a small amount of black powder. The mixture was filtered and the solution was concentrated until the incipient formation of orange crystals. The mixture was layered with hexane (8 mL) and kept at ambient temperature for one week. **5** was isolated after filtration, washing with hexane (2 mL) and drying under vacuum. Yield: 0.050 g (21 %), m.p. 170 °C. Elemental analysis calcd (%) for C<sub>50</sub>H<sub>81</sub>N<sub>6</sub>AsSiZn: C 64.26, H 8.74, N 8.99; found: C 63.46, H 8.87, N 9.07. <sup>1</sup>H NMR (C<sub>6</sub>D<sub>6</sub>, 200 MHz, 298 K): δ (ppm) = 1.15 (d, <sup>3</sup>J<sub>HH</sub> = 6.9 Hz, 12H, NHC-*i*Pr-CH<sub>3</sub>), 1.30 (d, <sup>3</sup>J<sub>HH</sub> = 6.9 Hz, 6H, L-*i*Pr-CH<sub>3</sub>), 1.33 (s, 18H, NHSi-<sup>t</sup>Bu-CH<sub>3</sub>), 1.50 (s, 6H, NHC-*i*Pr-CMe), 1.69 (d, <sup>3</sup>J<sub>HH</sub> = 6.8 Hz, 12H, L-*i*Pr-CH<sub>3</sub>), 1.75 (s, 6H, L-NCMe), 3.57 (sept, <sup>3</sup>J<sub>HH</sub> = 6.9 Hz, 4H, L-*i*Pr-CH), 5.05 (s, 1H, L-NCCHCN), 5.69 (s, 2H, NHSi-NCH), 7.03 (sept, <sup>3</sup>J<sub>HH</sub> = 6.9 Hz, 2H, NHC-*i*Pr-CH), 7.26 (s, 6 H; *m* and *p* ArH). <sup>13</sup>C{<sup>1</sup>H}-NMR (C<sub>6</sub>D<sub>6</sub>, 50 MHz, 298 K): δ (ppm) = 10.45 (NHC-CMe), 21.81 (NHC-*i*Pr-CH<sub>3</sub>), 24.31 (L-NCMe), 24.59 and 25.95 (L-*i*Pr-CH<sub>3</sub>), 28.74 (L-*i*Pr-CH), 31.24 (NHSi-<sup>t</sup>Bu-CH<sub>3</sub>), 48.77 (NHC-*i*Pr-CH), 52.88 (NHSi-<sup>t</sup>Bu-CMe<sub>3</sub>), 95.61 (L-NCCHCN), 111.90 (NHSi-NCH), 123.56, 125.13 and 126.60 (L *m* and *p* -ArC), 128.28 (L *o*-ArC), 142.75 (NHC-CMe), 147.02 (L *i*-ArC), 156.64 (NHC-NC:N), 166.55 (L-NCCHCN). <sup>29</sup>Si{<sup>1</sup>H}-NMR (C<sub>6</sub>D<sub>6</sub>, 79 MHz, 298 K) δ (ppm) = -6.31.

[Type text]

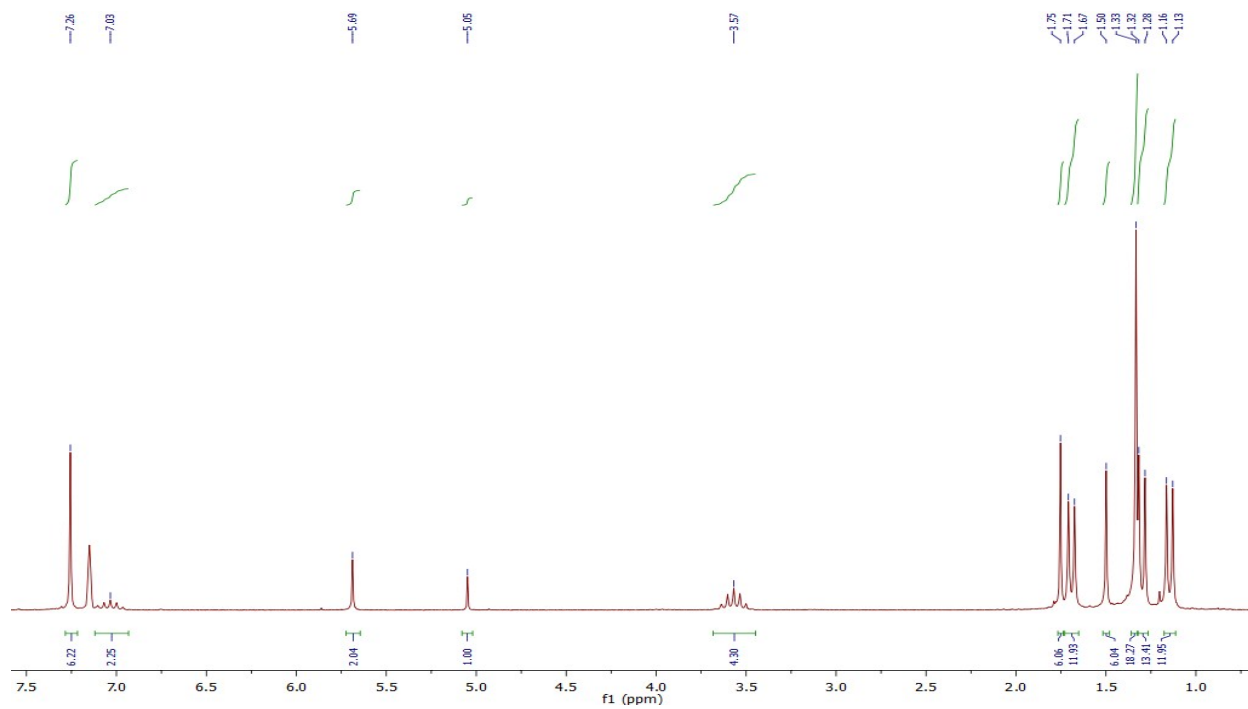

Figure S7.  $^1\text{H}$ -NMR spectrum of **5** in  $\text{C}_6\text{D}_6$  at 298 K.

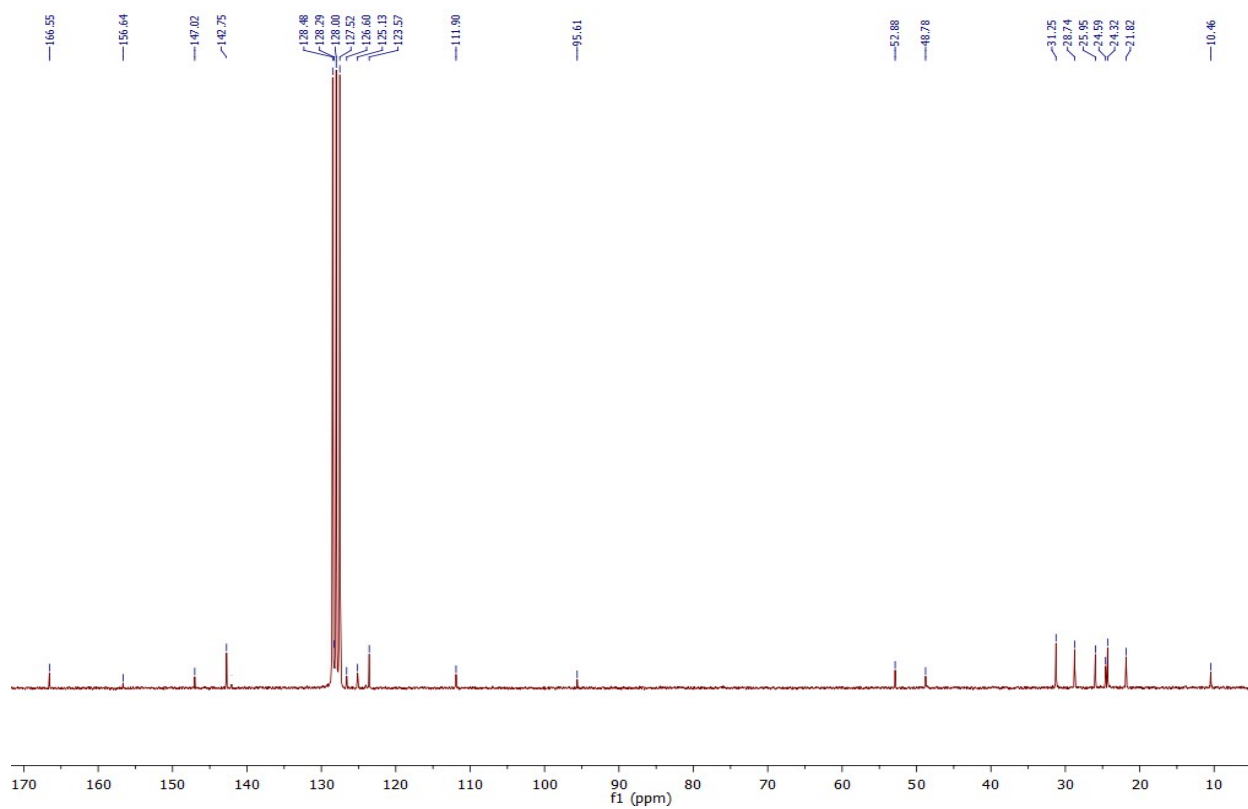

Figure S8.  $^{13}\text{C}\{^1\text{H}\}$ -NMR spectrum of **5** in  $\text{C}_6\text{D}_6$  at 298 K.

[Type text]

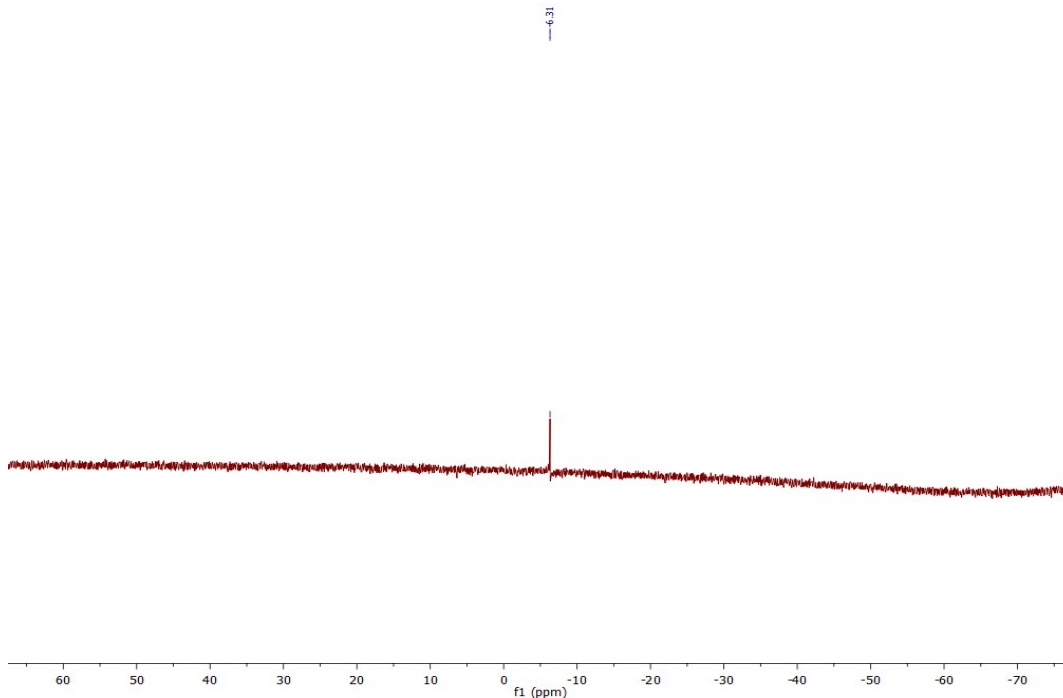

Figure S9.  $^{29}\text{Si}\{^1\text{H}\}$ -NMR spectrum of **5** in  $\text{C}_6\text{D}_6$  at 298 K.

#### 1.1.4. Synthesis of $[\{(\text{}^t\text{BuNHSi})\rightarrow\text{AsZnL}\}_2]$ (**6**)

A  $\text{Et}_2\text{O}$  (25 mL) solution of **1** (0.36 g, 0.71 mmol) at ambient temperature was added dropwise to a suspension of  $\text{NaAsCO}(\text{dioxane})_{2,3}$  (0.25 g, 0.78 mmol, 1.1 eq.) in  $\text{Et}_2\text{O}$  (15 mL) precooled at  $0\text{ }^\circ\text{C}$ . The white mixture was stirred and warmed up to ambient temperature in 30 minutes, after this, a blue solution mixed with a colorless to red solid was obtained. The sensitive and blue solution containing  $\text{LZnAsCO}$  was Teflon-cannula filtered and immediately added to a  $\text{Et}_2\text{O}$  (15 mL) solution of  ${}^t\text{BuNHSi}$  (0.14 g, 0.71 mmol) at ambient temperature under stirring. The resulting solution became green, gas evolution was observed, and after one hour, a fine and yellow solid precipitated from the mixture. Then, the solution was filtered, the solid was washed with  $\text{Et}_2\text{O}$  (2 x 5 mL) and hexane (2 x 2 mL) and dried under vacuum. Yield: 0.16 g (30 %), m.p.  $226\text{ }^\circ\text{C}$  (d.). Crystals of **6** can be obtained from a saturated THF solution of the crude solid. Elemental analysis calcd (%) for  $\text{C}_{78}\text{H}_{122}\text{N}_8\text{As}_2\text{Si}_2\text{Zn}_2$ : C 62.10, H 8.15, N 7.43; found: C 62.05, H 8.24, N 7.15.  $^1\text{H}$  NMR ( $\text{C}_6\text{D}_6$ , 200 MHz, 298 K):  $\delta$  (ppm) = 1.13 (d,  ${}^3J_{\text{HH}} = 6.8$  Hz, 12H,  $\text{L-}^i\text{Pr-CH}_3$ ), 1.36 (s, 18H,  $\text{NHSi-}^t\text{Bu-CH}_3$ ), 1.37 (d,  ${}^3J_{\text{HH}} = 6.8$  Hz, 12H,  $\text{L-}^i\text{Pr-CH}_3$ ), 1.45 (s, 6H, L-N $\text{CMe}$ ), 3.12 (sept,  ${}^3J_{\text{HH}} = 6.8$  Hz, 4H, L- $^i\text{Pr-CH}$ ), 4.93 (s, 1H, L-N $\text{CCHCN}$ ), 5.67 (s, 2H,  $\text{NHSi-NCH}$ ), 7.11 (s, 6 H; *m* and *p* - $\text{ArH}$ ). CP/MAS  $^{29}\text{Si}\{^1\text{H}\}$ -NMR  $\delta$  (ppm) = -23.53.



[Type text]

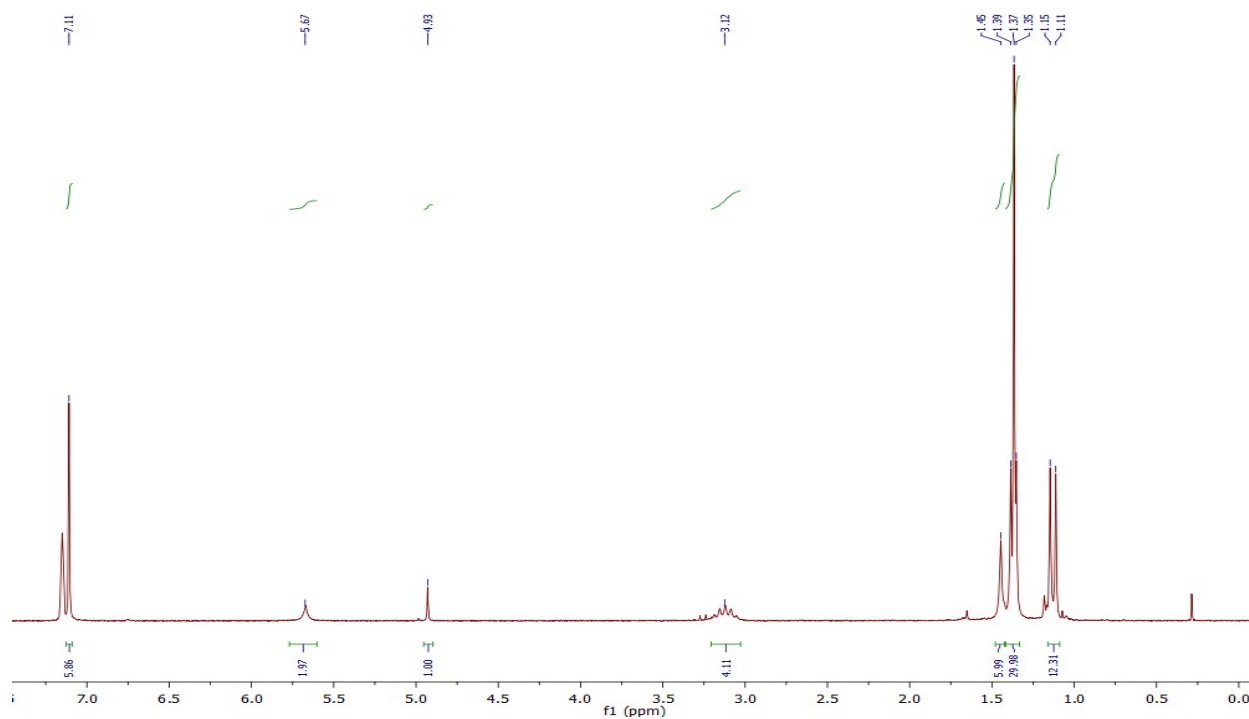

Figure S10.  $^1\text{H-NMR}$  spectrum of **6** in  $\text{C}_6\text{D}_6$  at 298 K.

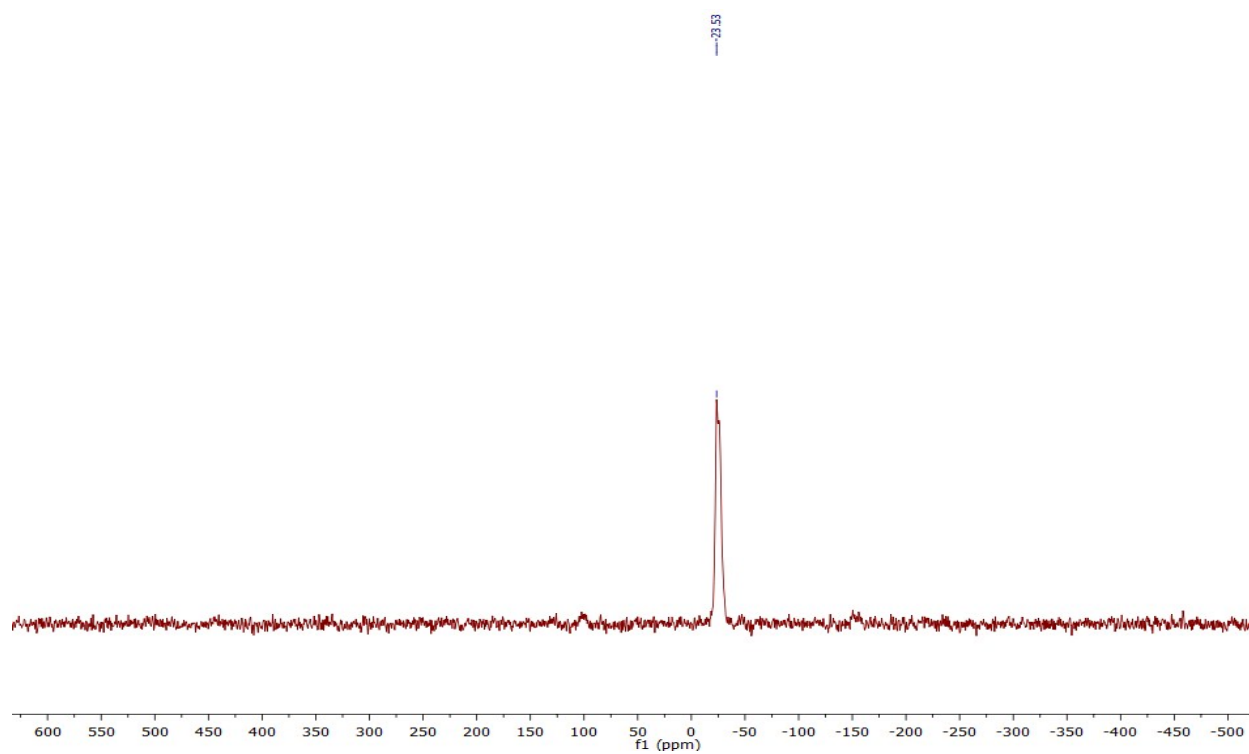

Figure S11. CP/MAS  $^{29}\text{Si-NMR}$  spectrum of **6** in  $\text{C}_6\text{D}_6$  at 298 K.

[Type text]

### 1.1.5. Synthesis of [(DippNHSi)→AsZnL] (**7**)

A Et<sub>2</sub>O (50 mL) solution of **1** (0.81 g, 1.1 mmol) at ambient temperature was added dropwise to a suspension of NaAsCO(dioxane)<sub>2,3</sub> (0.43 g, 1.3 mmol, 1.1 eq.) in Et<sub>2</sub>O (20 mL) precooled at 0 °C. The white mixture was stirred and warmed up to ambient temperature in 40 minutes, after this, a blue solution mixed with a colorless to red solid was obtained. The sensitive and blue solution containing LZnAsCO was Teflon-cannula filtered and immediately added to a Et<sub>2</sub>O (10 mL) solution of DippNHSi (0.38 g, 1.1 mmol) at ambient temperature under stirring. The resulting solution became darker, gas evolution was observed, and after one hour, the volatiles were removed under vacuum. The mixture was extracted with hexane (20 mL) and the volume of the solution was reduced until the incipient formation of orange crystals. The mixture was kept at ambient temperature overnight. After this, a first batch of **7** was collected, washed with hexane (2 mL), and dried under vacuum. Given the high solubility of **7** in hexane, one additional crystallization from the mother liquor were carried out at 4 °C. Yield: 0.20 g (19 %), m.p. 193 °C (d.). Elemental analysis calcd (%) for C<sub>55</sub>H<sub>77</sub>N<sub>4</sub>AsSiZn: C 68.62, H 8.06, N 5.82; found: C 69.12, H 8.24, N 5.61. <sup>1</sup>H NMR (C<sub>6</sub>D<sub>6</sub>, 200 MHz, 298 K): δ (ppm) = 1.05-1.22 (m, 48H, L- and NHSi- *i*-Pr-CH<sub>3</sub>), 1.54 (s, 6H, L-NCMe), 3.15 and 3.28 (2 x sept, <sup>3</sup>J<sub>HH</sub> = 6.9 Hz, 8H, L- and DippNHSi- *i*-Pr-CH), 4.89 (s, 1H, L-NCCHCN), 5.85 (s, 2H, NHSi-NCH), 7.00-7.14 (m, 12H; L and DippNHSi *m* and *p* ArH). <sup>13</sup>C{<sup>1</sup>H}-NMR (C<sub>6</sub>D<sub>6</sub>, 50 MHz, 298 K): δ (ppm) = 24.40 (L-CMe), 24.01, 24.81, 25.09 and 25.17 (L- and NHSi- *i*-Pr-CH<sub>3</sub>), 28.61 and 28.84 (L- and NHSi- *i*-Pr-CH), 96.94 (L-NCCHCN), 122.93 (NHSi-NCH), 123.94, 124.09, 126.22 and 128.28 (L and DippNHSi *m* and *p*-ArC), 138.15 and 142.61 (L and DippNHSi *o*-ArC), 144.84 and 146.07 (L and DippNHSi *i*-ArC), 168.04 (L-NCCHCN). <sup>29</sup>Si{<sup>1</sup>H}-NMR (C<sub>6</sub>D<sub>6</sub>, 79 MHz, 298 K) δ (ppm) = 65.86.

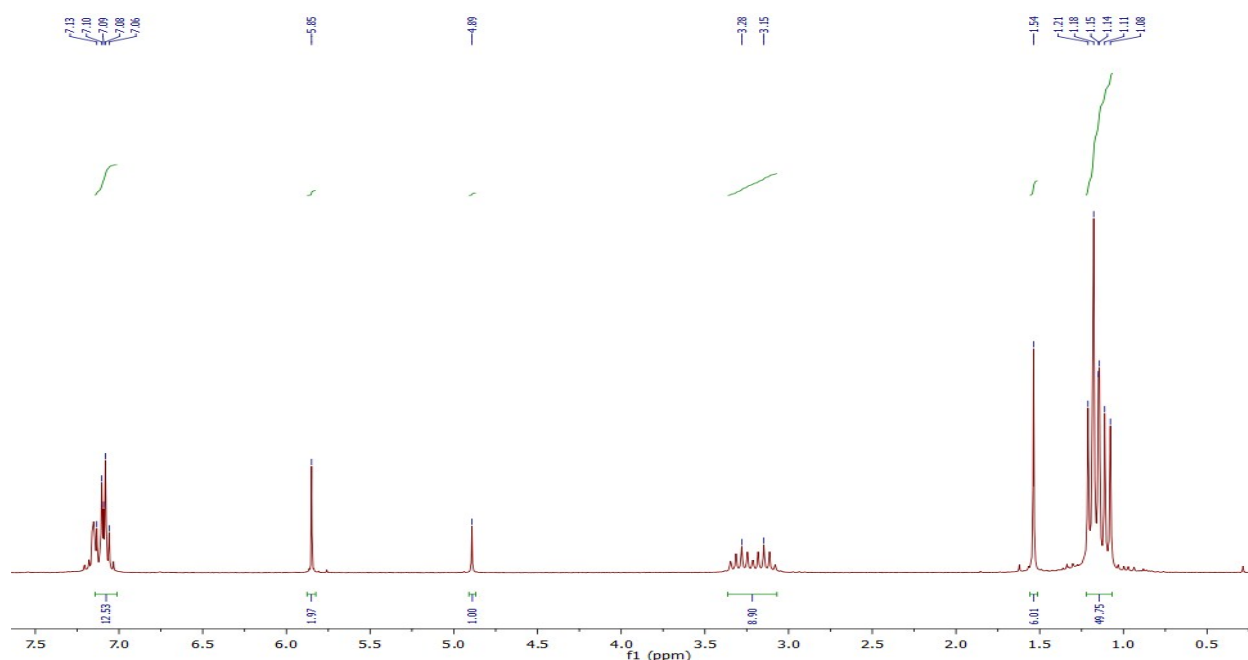

Figure S12. <sup>1</sup>H-NMR spectrum of **7** in C<sub>6</sub>D<sub>6</sub> at 298 K.

[Type text]

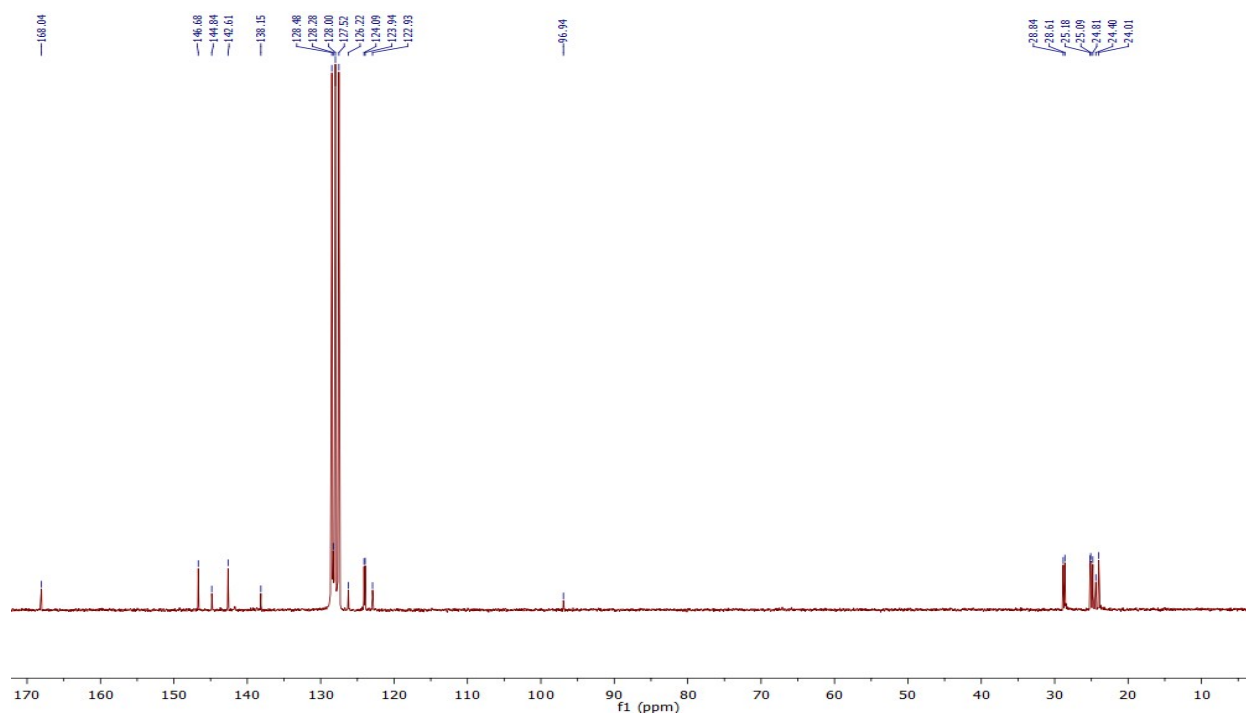

Figure S13. <sup>13</sup>C{<sup>1</sup>H}-NMR spectrum of 7 in C<sub>6</sub>D<sub>6</sub> at 298 K.

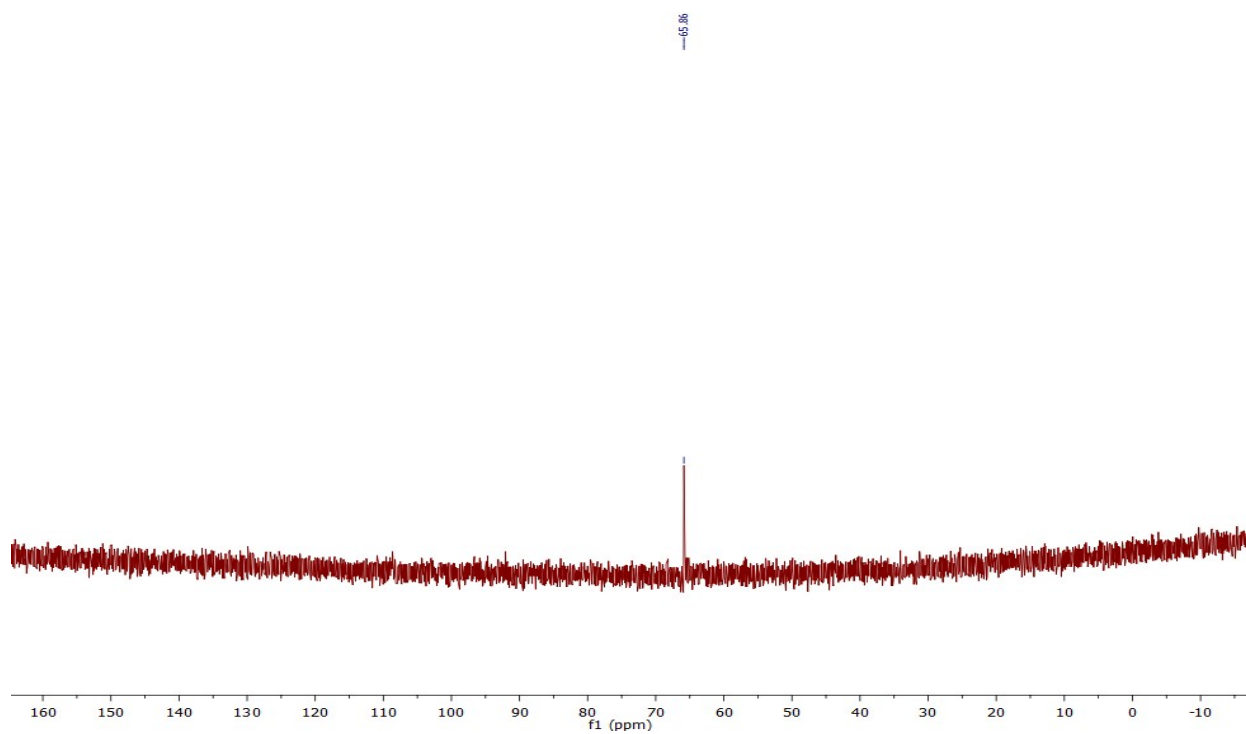

Figure S14. <sup>29</sup>Si{<sup>1</sup>H}-NMR spectrum of 7 in C<sub>6</sub>D<sub>6</sub> at 298 K.

[Type text]

## 2. Crystallographic data

Crystals were each mounted on a glass capillary in perfluorinated oil and measured in a cold N<sub>2</sub> flow. The data of compounds **3-7** were collected on an Oxford Diffraction Supernova, Single source at offset, Atlas at 150 K (Cu-K $\alpha$ -radiation,  $\lambda = 1.54184 \text{ \AA}$ ). The structures were solved by direct methods or using the SHELXT program<sup>6</sup> and refined on F2 with the SHELX-2016 software package.<sup>7</sup> The positions of the H atoms were calculated and considered isotropically according to a riding model. CCDC 1828201 (**3**), 1828202 (**4**), 1828203 (**5**), 1828204 (**6**) and 1828205 (**7**) contain the supplementary crystallographic data for this paper. These data can be obtained free of charge by contacting The Cambridge Crystallographic Data Centre, 12, Union Road, Cambridge CB2 1EZ, UK; fax: +44 1223 336033.

**Table S1.** Summary of Crystallographic Data for Compounds **3-7**.

|                                            | <b>3</b>                                              | <b>4</b>                                             | <b>5</b>                                              | <b>6</b>                                              | <b>7</b>                                              |
|--------------------------------------------|-------------------------------------------------------|------------------------------------------------------|-------------------------------------------------------|-------------------------------------------------------|-------------------------------------------------------|
| CCDC                                       | 1828201                                               | 1828202                                              | 1828203                                               | 1828204                                               | 1828205                                               |
| empirical form.                            | C <sub>40</sub> H <sub>61</sub> ClN <sub>4</sub> Zn   | C <sub>41</sub> H <sub>61</sub> AsN <sub>4</sub> OZn | C <sub>50</sub> H <sub>81</sub> AsN <sub>6</sub> SiZn | C <sub>39</sub> H <sub>61</sub> AsN <sub>4</sub> SiZn | C <sub>55</sub> H <sub>77</sub> AsN <sub>4</sub> SiZn |
| formula wt                                 | 698.74                                                | 766.22                                               | 934.68                                                | 754.29                                                | 962.58                                                |
| crystal syst.                              | orthorhombic                                          | monoclinic                                           | triclinic                                             | monoclinic                                            | monoclinic                                            |
| space group                                | <i>P</i> 2 <sub>1</sub> 2 <sub>1</sub> 2 <sub>1</sub> | <i>P</i> 2 <sub>1</sub> / <i>n</i>                   | <i>P</i> -1                                           | <i>P</i> 2 <sub>1</sub> / <i>c</i>                    | <i>P</i> 2 <sub>1</sub> / <i>c</i>                    |
| <i>a</i> (Å)                               | 11.83520(10)                                          | 17.2926(2)                                           | 13.5770(6)                                            | 13.8602(2)                                            | 14.0308(1)                                            |
| <i>b</i> (Å)                               | 17.5939(2)                                            | 11.8957(1)                                           | 14.7552(5)                                            | 21.5672(3)                                            | 13.9065(1)                                            |
| <i>c</i> (Å)                               | 18.3290(2)                                            | 19.9787(2)                                           | 14.8121(5)                                            | 12.9197(1)                                            | 26.7370(2)                                            |
| $\alpha$ (deg)                             | 90                                                    | 90                                                   | 92.378(3)                                             | 90                                                    | 90                                                    |
| $\beta$ (deg)                              | 90                                                    | 104.184(1)                                           | 107.476(4)                                            | 95.682(1)                                             | 90.031(1)                                             |
| $\gamma$ (deg)                             | 90                                                    | 90                                                   | 112.237(4)                                            | 90                                                    | 90                                                    |
| vol (Å <sup>3</sup> )                      | 3816.60(7)                                            | 3984.48(7)                                           | 2579.10(19)                                           | 3843.06(8)                                            | 5216.90(7)                                            |
| <i>Z</i>                                   | 4                                                     | 4                                                    | 2                                                     | 4                                                     | 4                                                     |
| $\rho_{\text{calcd}}$ (g/cm <sup>3</sup> ) | 1.216                                                 | 1.277                                                | 1.203                                                 | 1.304                                                 | 1.226                                                 |
| $\mu$ (mm <sup>-1</sup> )                  | 1.767                                                 | 2.038                                                | 1.872                                                 | 2.372                                                 | 1.858                                                 |
| <i>F</i> (000)                             | 1504                                                  | 1624                                                 | 1000                                                  | 1600                                                  | 2048                                                  |
| reflns collect.                            | 15746                                                 | 15940                                                | 18017                                                 | 14765                                                 | 25494                                                 |
| unique reflns                              | 6952                                                  | 7530                                                 | 9688                                                  | 7231                                                  | 10200                                                 |
| R <sub>int</sub>                           | 0.0388                                                | 0.0240                                               | 0.0417                                                | 0.0218                                                | 0.0289                                                |
| R1 [I > 2 $\sigma$ (I)]                    | 0.0370                                                | 0.0407                                               | 0.0411                                                | 0.0284                                                | 0.0372                                                |
| wR2                                        | 0.0988                                                | 0.01192                                              | 0.1201                                                | 0.0826                                                | 0.1018                                                |

[Type text]

## 2.1. Molecular structure of LZnCl(NHC) (**3**)

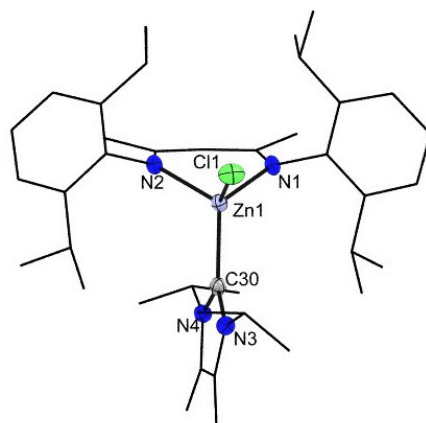

**Figure S15.** Molecular structure of **3**. Thermal ellipsoids are drawn at 50 % probability. H atoms are omitted for clarity. Selected bond lengths [Å] and angles [°] for **3**: N1-Zn1 2.038(2), N2-Zn1: 2.038(2), Zn1-Cl1 2.254(1), Zn1-Zn30 2.097(2), N1-Zn1-N2 94.13(8), C30-Zn1-C11 115.13(7).

[Type text]

### 3. Computational data

#### Computational details:

DFT calculations were performed at the B3LYP-D3/def2-SVP[Si,Ni,As:def2-TZVP] level of theory.<sup>8-11</sup> Stationary points on the potential energy surface (PES) were characterized by harmonic vibrational frequency calculations. Electronic structure analysis and NMR shift calculations were executed at the same B3LYP-D3/def2-SVP[Si,Ni,As:def2-TZVP] level of theory. Calculations were carried out using the GAUSSIAN 09 program suite.<sup>12</sup>

#### 3.1. Compound [NHC→<sup>t</sup>BuNHSi→AsZnL] (**5**)

NPA charge: Si: +1.61; As: -1.03; Zn: +0.99

MBO: Si1-As1: 1.31; Zn1-As1: 1.02

WBI: Si1-As1: 1.33; Zn1-As1: 0.87

Natural Ionicity: Si1-As1: 0.24; Zn1-As1: 0.77

<sup>29</sup>Si-NMR: -1 ppm

**Table S3.** NBO analysis of compound **5**.

| NBO       | atom | Occupation | polarization | s-character | p-character | d-character |
|-----------|------|------------|--------------|-------------|-------------|-------------|
| Bond      | Si   | 1.94       | 44.00%       | 46.49%      | 52.94%      | 0.54%       |
|           | As   |            | 56.00%       | 18.64%      | 80.61%      | 0.71%       |
| Bond      | Zn   | 1.90       | 26.27%       | 92.29%      | 6.58%       | 1.13%       |
|           | As   |            | 73.73%       | 10.17%      | 89.11%      | 0.72%       |
| Lone pair | As   | 1.84       | -            | 71.15%      | 28.70%      | 0.14%       |
| Lone pair | As   | 1.61       | -            | 0.00%       | 99.64%      | 0.33%       |

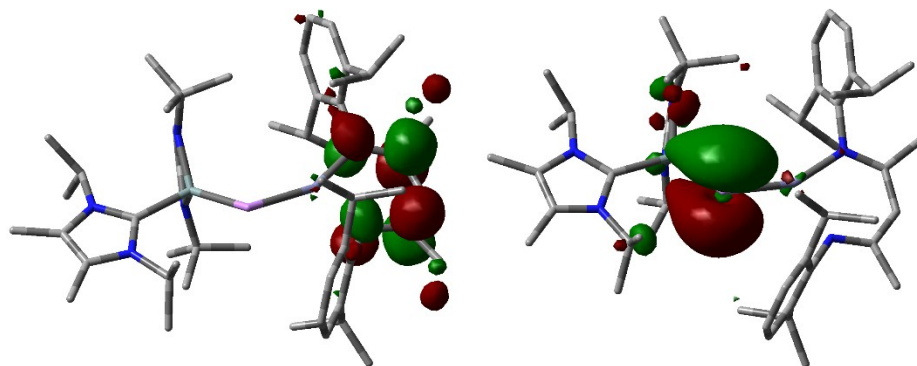

**Figure S16.** LUMO (left, -1.31 eV) and HOMO (right, -2.91 eV) of **5**. Isovalues are 0.04 au.

[Type text]

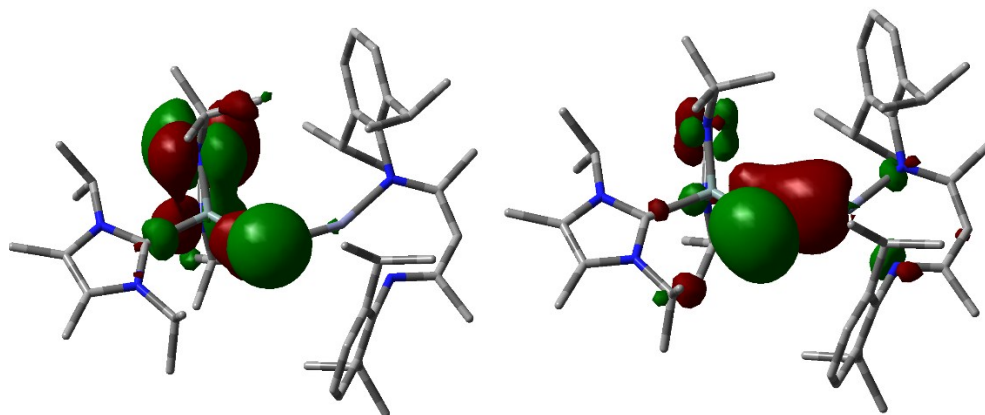

**Figure S17.** HOMO-1 (left, -3.02 eV) and HOMO-2 (right, -4.09 eV) of **5**. Isovalues are 0.04 au.

### 3.2. Compound $[(t\text{BuNHSi})\rightarrow\text{AsZnL}]_2$ (**6**)

NPA charge: Si: +1.55; As: -0.95; Zn: +1.14

MBO: As1-Si1: 1.07; As1- Si1': 0.80; Zn1-As1: 0.89

WBI: As1-Si1: 1.03; As1- Si1': 0.78; Zn1-As1: 0.65

Natural Ionicity: As1-Si1: 0.40; As1- Si1' 0.61; Zn1-As1: 0.89

$^{29}\text{Si}$ -NMR: -15 ppm

**Table S4.** NBO analysis of compound **6**.

| NBO       | atom | Occupation | polarization | s-character | p-character | d-character |
|-----------|------|------------|--------------|-------------|-------------|-------------|
| Bond      | Si   | 1.92       | 33.08%       | 32.04%      | 66.74%      | 1.20%       |
|           | As   |            | 66.92%       | 20.82%      | 78.74%      | 0.40%       |
| Bond      | Si   | 1.94       | 39.66%       | 39.64%      | 59.39%      | 0.94%       |
|           | As   |            | 60.34%       | 19.30%      | 80.10%      | 0.56%       |
| Bond      | Zn   | 1.94       | 19.30%       | 86.63%      | 12.60%      | 0.77%       |
|           | As   |            | 80.70%       | 17.79%      | 81.93%      | 0.26%       |
| Lone pair | As   | 1.78       | -            | 41.91%      | 57.93%      | 0.15%       |

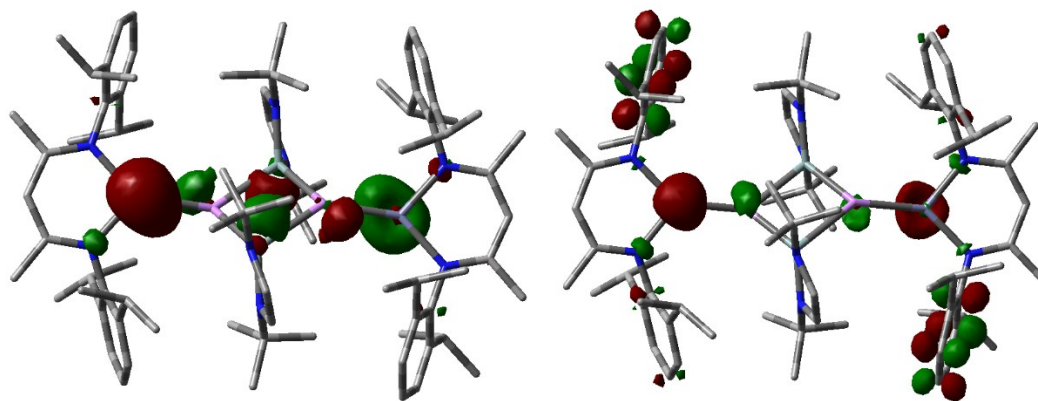

**Figure S18.** LUMO+2 (left, -0.59 eV) and LUMO+3 (right, -0.32 eV) of **6**. Isovalues are 0.04 au.

[Type text]

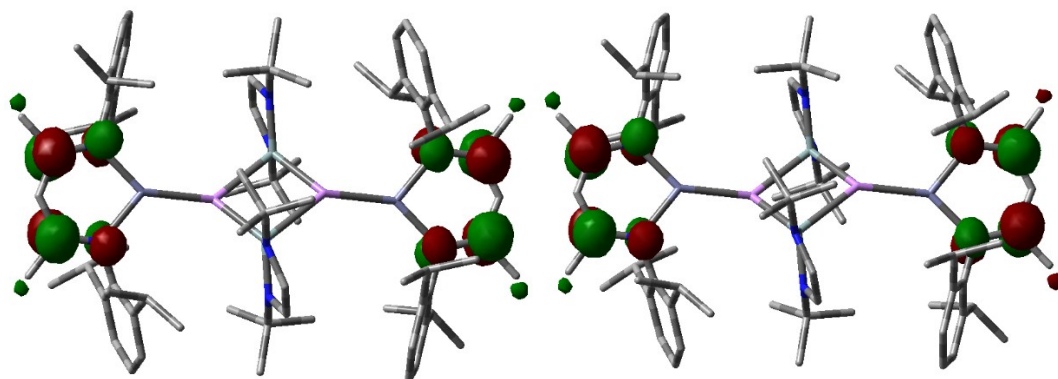

**Figure S19.** LUMO (left, -1.11 eV) and LUMO+1 (right, -1.11 eV) of **6**. Isovalues are 0.04 au.

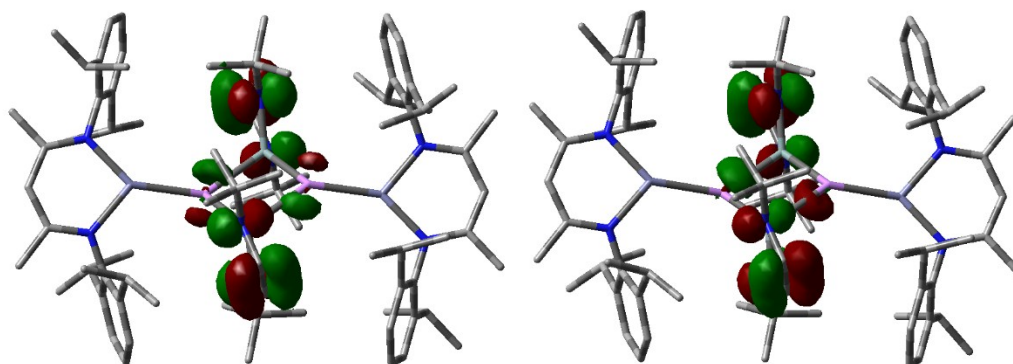

**Figure S20.** HOMO (left, -3.86 eV) and HOMO-1 (right, -4.16 eV) of **6**. Isovalues are 0.04 au.

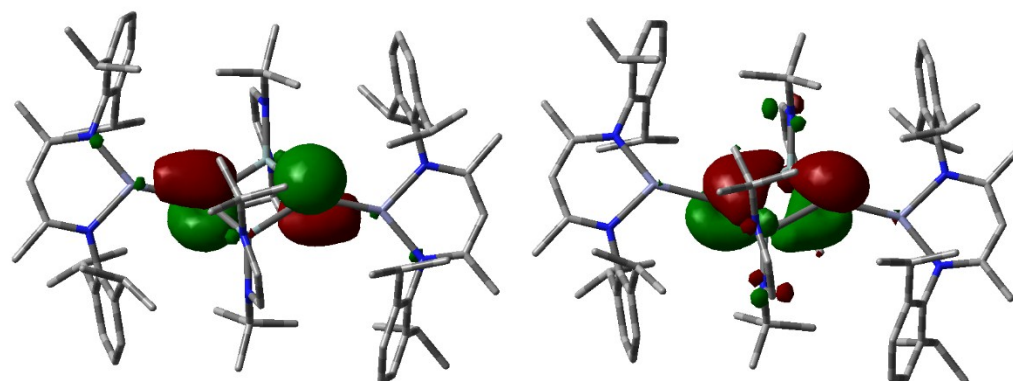

**Figure S21.** HOMO-2 (left, -4.48 eV) and HOMO-3 (right, -5.02 eV) of **6**. Isovalues are 0.04 au.



[Type text]

### 3.3. Compound [(DippNHSi)→AsZnL] (7)

NPA charge: Si: +1.41; As: -0.82; Zn: +1.05

MBO: Si1-As1: 1.66; Zn1-As1: 0.95

WBI: Si1-As1: 1.72; Zn1-As1: 0.77

Natural Ionicity: Si1-As1( $\sigma$ ): 0.00; Si1-As1( $\pi_1$ ): 0.88; Si1-As1( $\pi_2$ ): 0.93

$^{29}\text{Si}$ -NMR: +74 ppm

**Table S5.** NBO analysis of compound 7. Orbital number is in parenthesis.

| NBO                       | atom | Occupation | polarization | s-character | p-character | d-character |
|---------------------------|------|------------|--------------|-------------|-------------|-------------|
| Bond (NBO-152)            | Si   | 1.96       | 49.98%       | 70.42%      | 29.28%      | 0.26%       |
|                           | As   |            | 50.02%       | 12.33%      | 86.71%      | 0.91%       |
| Bond (NBO-256)            | Si   | 1.91       | 19.81%       | 0.16%       | 98.23%      | 1.45%       |
|                           | As   |            | 80.19%       | 0.38%       | 98.88%      | 0.70%       |
| Bond (NBO-244)            | Si   | 1.62       | 16.15%       | 0.06%       | 98.54%      | 1.28%       |
|                           | As   |            | 83.85%       | 5.53%       | 93.13%      | 1.32%       |
| Anti-bond (NBO-260)       | Si   | 0.32       | 16.15%       | 0.06%       | 98.54%      | 1.28%       |
|                           | As   |            | 83.85%       | 5.53%       | 93.13%      | 1.32%       |
| Lone pair (NBO-123)       | As   | 1.82       | -            | 81.83%      | 18.06%      | 0.11%       |
| Empty lone pair (NBO-257) | Zn   | 0.57       | -            | 98.11%      | 1.10%       | 0.80%       |

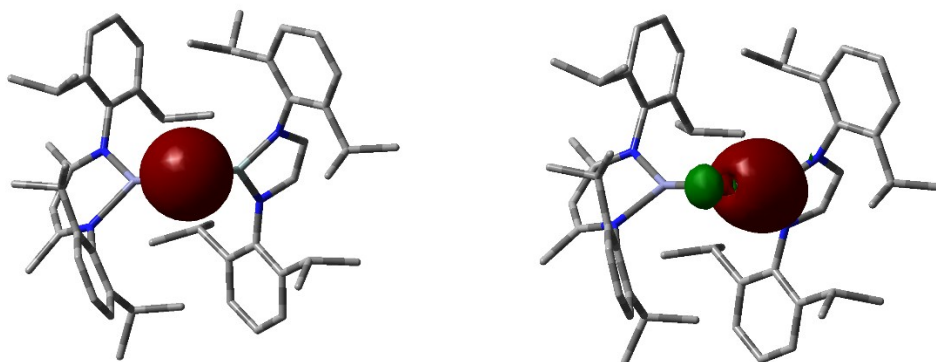

**Figure S22.** NBO-123 (left) and NBO-152 (right) of 7. Isovalues are 0.04 au.

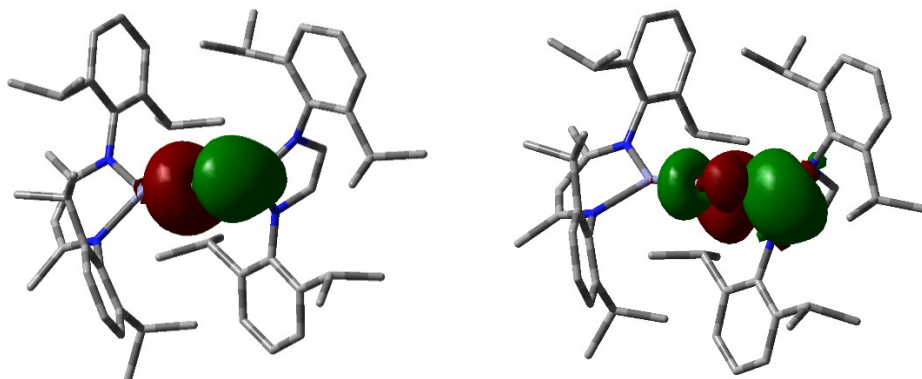

**Figure S23.** NBO-244 (left) and NBO-260 (right) of 7. Isovalues are 0.04 au.

[Type text]

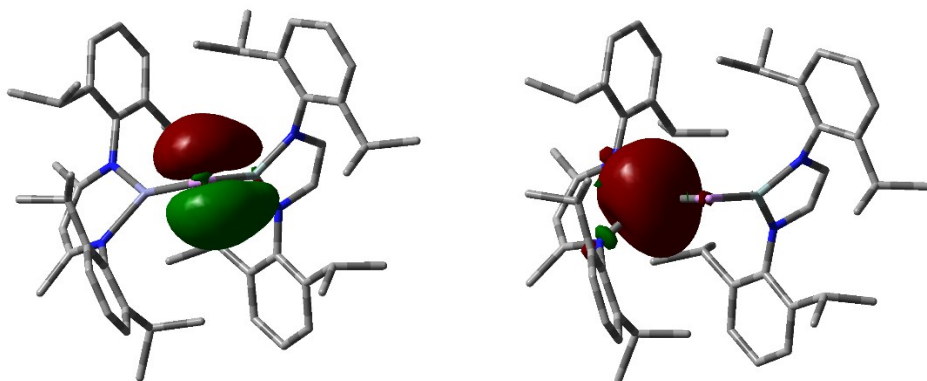

**Figure S24.** NBO-256 (left) and NBO-257 (right) of 7. Isovalues are 0.04 au.

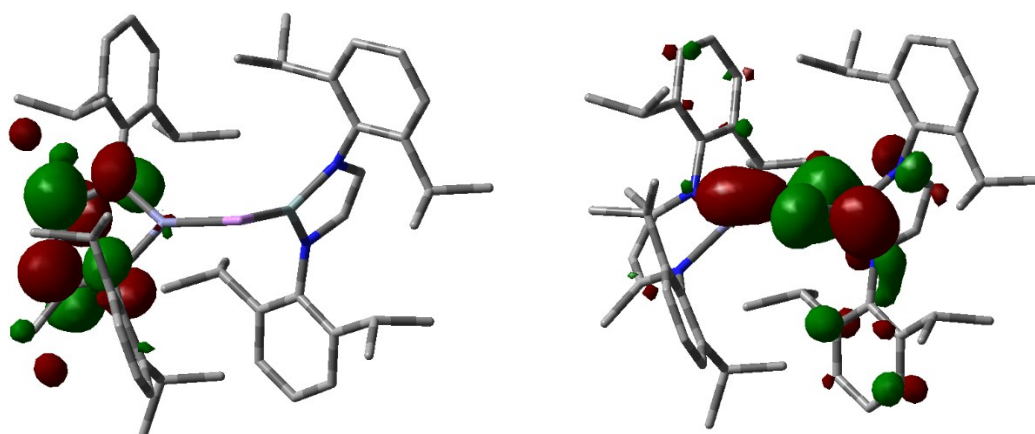

**Figure S25.** LUMO (left, -1.14 eV) and LUMO+1 (right, -0.68 eV) of 7. Isovalues are 0.04 au.

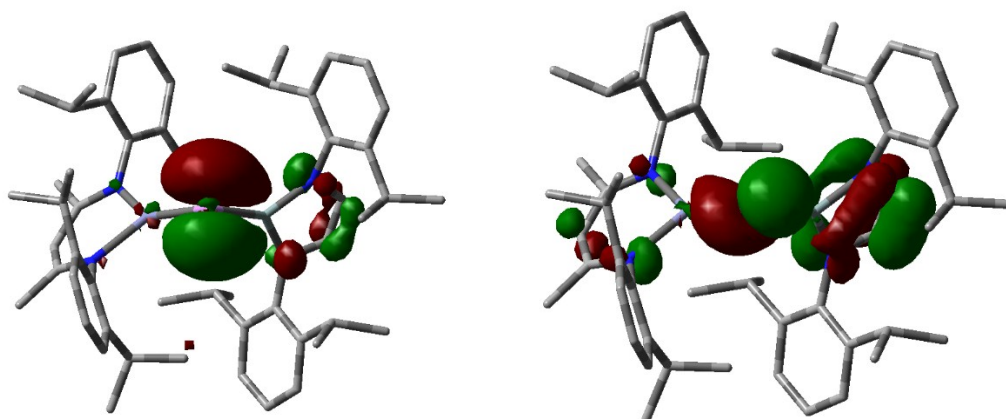

**Figure S26.** HOMO (left, -4.57 eV) and HOMO-1 (right, -5.38 eV) of 7. Isovalues are 0.04 au.

[Type text]

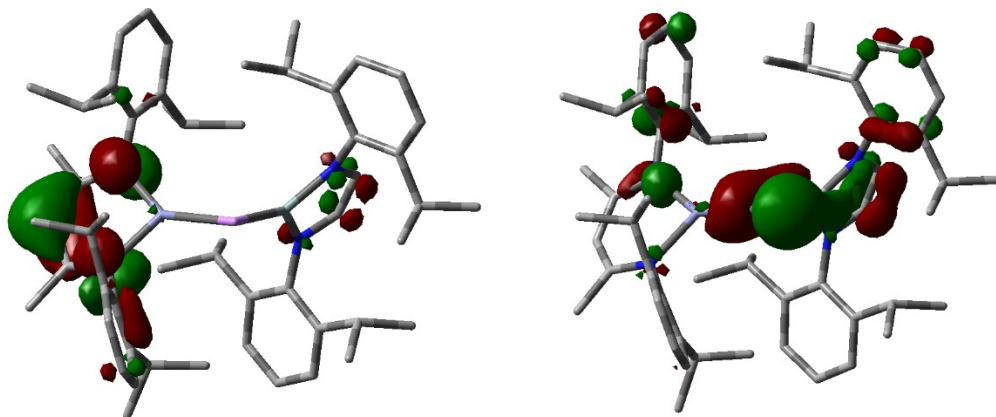

**Figure S27.** HOMO-2 (left, -5.62 eV) and HOMO-4 (right, -6.32 eV) of **7**. Isovalues are 0.04 au.

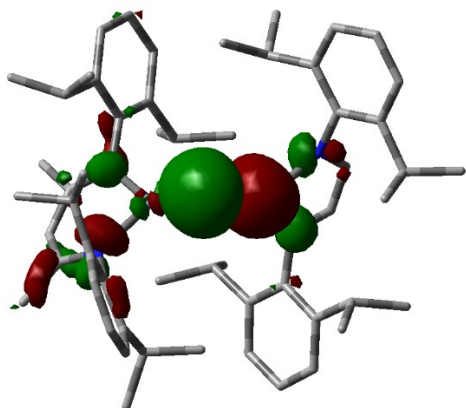

**Figure S28.** HOMO-12 (-7.59 eV) of **7**. Isovalues are 0.04 au.

### 3.4. Optimized geometries for compounds 5-7.

**Table S6.** Cartesian geometry of **5** in Angstrom [ $\text{\AA}$ ].

| Atomtype | X<br>coordinates | Y<br>coordinates | Z<br>coordinates |
|----------|------------------|------------------|------------------|
| As       | -0.329564        | 0.832956         | -0.643332        |
| Zn       | 1.714323         | 0.106757         | 0.2144           |
| Si       | -1.945385        | -0.570064        | 0.047966         |
| C        | -3.722702        | 0.286192         | -0.432368        |
| N        | 3.184829         | -1.199035        | 0.535957         |
| N        | -4.027087        | 1.593243         | -0.686416        |
| N        | -2.01265         | -2.249183        | -0.526155        |
| N        | 2.948988         | 1.759994         | 0.404276         |
| N        | -2.260689        | -1.101927        | 1.721853         |
| N        | -4.915954        | -0.377569        | -0.479091        |
| C        | -0.138951        | -2.99459         | -1.96124         |

[Type text]

|   |           |           |           |
|---|-----------|-----------|-----------|
| H | 0.392021  | -2.048598 | -1.798313 |
| H | 0.149721  | -3.398892 | -2.944989 |
| H | 0.194817  | -3.702125 | -1.188869 |
| C | -2.104792 | -1.748405 | -2.933794 |
| H | -3.192422 | -1.57856  | -2.880476 |
| H | -1.86478  | -2.124206 | -3.940512 |
| H | -1.593853 | -0.784257 | -2.797907 |
| C | 1.737932  | -2.973441 | 2.344822  |
| H | 1.182305  | -2.045171 | 2.120842  |
| C | 3.388871  | -2.958295 | -1.15595  |
| C | 2.962458  | -2.551771 | 0.132867  |
| C | 5.466137  | -1.927654 | 1.111716  |
| H | 5.063072  | -2.80726  | 1.631217  |
| H | 6.333973  | -1.547967 | 1.666645  |
| H | 5.816249  | -2.279107 | 0.128372  |
| C | 4.016039  | -1.963944 | -2.130822 |
| H | 4.406831  | -1.11749  | -1.549634 |
| C | -3.043157 | 2.704468  | -0.722525 |
| H | -2.112737 | 2.248938  | -0.349838 |
| C | 2.333735  | 3.281738  | -1.404853 |
| C | 2.389747  | 3.00314   | -0.014807 |
| C | 2.819333  | -2.62286  | 3.384531  |
| H | 3.466841  | -3.493251 | 3.583145  |
| H | 2.344162  | -2.336201 | 4.337107  |
| H | 3.451169  | -1.783481 | 3.072077  |
| C | 4.191615  | 1.692055  | 0.856837  |
| C | -1.657097 | -2.766332 | -1.870078 |
| C | 4.416142  | -0.845162 | 0.934637  |
| C | -2.177496 | -2.504881 | 1.778519  |
| H | -2.234897 | -3.030724 | 2.727845  |
| C | -2.034435 | -3.1185   | 0.584652  |
| H | -1.967946 | -4.195981 | 0.4563    |
| C | 2.294983  | -3.450373 | 1.002636  |
| C | 2.125814  | -4.775656 | 0.574029  |
| H | 1.628767  | -5.496768 | 1.222757  |
| C | 4.846041  | 0.473379  | 1.162586  |
| H | 5.864665  | 0.572104  | 1.535346  |
| C | -2.158339 | -0.299382 | 2.961726  |
| C | 2.57031   | -5.197403 | -0.679124 |
| H | 2.422235  | -6.234827 | -0.990149 |
| C | 1.807237  | 3.888509  | 0.921465  |
| C | -2.695081 | 1.113874  | 2.680855  |
| H | -2.128621 | 1.595508  | 1.873363  |

[Type text]

|   |           |           |           |
|---|-----------|-----------|-----------|
| H | -2.601641 | 1.746043  | 3.576766  |
| H | -3.757127 | 1.075153  | 2.391408  |
| C | -5.392147 | 1.743085  | -0.903242 |
| C | 3.179844  | -4.288914 | -1.541239 |
| H | 3.49612   | -4.62041  | -2.532506 |
| C | 0.748433  | -3.961326 | 2.974173  |
| H | -0.046069 | -4.243612 | 2.271822  |
| H | 0.268093  | -3.503568 | 3.8532    |
| H | 1.259483  | -4.874291 | 3.322784  |
| C | -5.955507 | 0.501144  | -0.766573 |
| C | 5.196958  | -2.548105 | -2.91981  |
| H | 5.946924  | -3.001706 | -2.252048 |
| H | 5.693356  | -1.755686 | -3.502926 |
| H | 4.875116  | -3.322304 | -3.635122 |
| C | 2.950502  | -1.389652 | -3.079834 |
| H | 2.48812   | -2.188129 | -3.68219  |
| H | 3.400099  | -0.655191 | -3.766779 |
| H | 2.145456  | -0.885225 | -2.523949 |
| C | 4.987233  | 2.966322  | 1.065765  |
| H | 4.898811  | 3.636712  | 0.198917  |
| H | 6.048479  | 2.755847  | 1.251391  |
| H | 4.587386  | 3.520631  | 1.928686  |
| C | -0.69124  | -0.225767 | 3.43448   |
| H | -0.319425 | -1.233989 | 3.667999  |
| H | -0.591133 | 0.395876  | 4.338555  |
| H | -0.057031 | 0.198972  | 2.643555  |
| C | -5.082572 | -1.810867 | -0.129737 |
| H | -4.062717 | -2.196787 | -0.110033 |
| C | -2.389221 | -4.095666 | -2.14705  |
| H | -2.032288 | -4.912475 | -1.502604 |
| H | -2.209603 | -4.406163 | -3.187867 |
| H | -3.474644 | -3.989374 | -2.002451 |
| C | 1.712893  | 3.543614  | 2.402858  |
| H | 2.306218  | 2.633469  | 2.574028  |
| C | -6.080146 | 3.034648  | -1.210941 |
| H | -5.53204  | 3.623702  | -1.957537 |
| H | -6.198459 | 3.662847  | -0.314014 |
| H | -7.081565 | 2.838593  | -1.616051 |
| C | 2.887422  | 2.28852   | -2.421525 |
| H | 2.810591  | 1.291444  | -1.964702 |
| C | 1.749137  | 4.48342   | -1.823695 |
| H | 1.706052  | 4.718662  | -2.888597 |
| C | -5.825977 | -2.60911  | -1.203276 |

[Type text]

|   |           |           |           |
|---|-----------|-----------|-----------|
| H | -6.912699 | -2.450649 | -1.196231 |
| H | -5.653778 | -3.680034 | -1.017984 |
| H | -5.440637 | -2.378032 | -2.207529 |
| C | -3.01145  | -0.910561 | 4.091777  |
| H | -4.057776 | -1.040236 | 3.776889  |
| H | -2.997647 | -0.242389 | 4.966671  |
| H | -2.630109 | -1.886825 | 4.425178  |
| C | 1.227072  | 5.075824  | 0.452918  |
| H | 0.773942  | 5.76773   | 1.167521  |
| C | -5.67388  | -1.96797  | 1.270358  |
| H | -5.077601 | -1.394099 | 1.990938  |
| H | -5.625516 | -3.026932 | 1.564234  |
| H | -6.72411  | -1.642684 | 1.332667  |
| C | 0.255605  | 3.20652   | 2.759222  |
| H | -0.389759 | 4.095983  | 2.662375  |
| H | 0.172347  | 2.836811  | 3.794311  |
| H | -0.128775 | 2.437775  | 2.074313  |
| C | -3.380682 | 3.848309  | 0.235279  |
| H | -4.116776 | 4.561479  | -0.163403 |
| H | -2.452222 | 4.40799   | 0.428461  |
| H | -3.744236 | 3.465567  | 1.20052   |
| C | -7.395832 | 0.128748  | -0.91876  |
| H | -8.015818 | 1.034599  | -0.91596  |
| H | -7.748935 | -0.511366 | -0.099148 |
| H | -7.587531 | -0.404063 | -1.863605 |
| C | 2.268855  | 4.644868  | 3.319298  |
| H | 3.308383  | 4.905619  | 3.065078  |
| H | 2.246744  | 4.318178  | 4.371962  |
| H | 1.671512  | 5.568535  | 3.250677  |
| C | 2.073541  | 2.240711  | -3.720327 |
| H | 1.007488  | 2.073555  | -3.502924 |
| H | 2.425331  | 1.414337  | -4.357516 |
| H | 2.173789  | 3.167404  | -4.308892 |
| C | 1.205644  | 5.382921  | -0.90584  |
| H | 0.754803  | 6.316664  | -1.252777 |
| C | 4.379488  | 2.531748  | -2.705855 |
| H | 4.540089  | 3.536273  | -3.131996 |
| H | 4.763441  | 1.790599  | -3.426849 |
| H | 4.98479   | 2.450234  | -1.791195 |
| C | -2.736646 | 3.156629  | -2.1483   |
| H | -2.469645 | 2.292837  | -2.773953 |
| H | -1.859014 | 3.820805  | -2.120963 |
| H | -3.569021 | 3.702797  | -2.620097 |

[Type text]

**Table S7.** Cartesian geometry of **6** in Angstrom [Å].

| Atomtype | X<br>coordinates | Y<br>coordinates | Z<br>coordinates |
|----------|------------------|------------------|------------------|
| Zn       | -3.235346        | 0.611532         | -2.175306        |
| As       | -1.107024        | 0.000512         | -1.299721        |
| Si       | 0.998252         | 1.071167         | -0.742326        |
| N        | -4.589061        | -0.742313        | -2.768733        |
| N        | 1.131728         | 2.820993         | -0.840429        |
| N        | -4.065519        | 2.186391         | -3.119695        |
| N        | 2.148103         | 0.863359         | -2.064428        |
| C        | -3.317555        | 3.40058          | -3.237425        |
| C        | 0.51639          | 3.890047         | -0.014725        |
| C        | -3.699037        | 4.551167         | -2.505528        |
| C        | -1.807718        | 2.184377         | -4.923976        |
| H        | -1.898259        | 1.313209         | -4.252924        |
| C        | -5.235026        | 2.083858         | -3.761121        |
| C        | -1.689856        | -1.743102        | -4.849942        |
| H        | -1.461305        | -1.225275        | -3.906968        |
| H        | -1.325056        | -1.122875        | -5.685339        |
| H        | -1.122515        | -2.688209        | -4.850367        |
| C        | -5.799185        | 3.271061         | -4.521941        |
| H        | -6.437964        | 3.875231         | -3.858766        |
| H        | -6.42046         | 2.92848          | -5.359944        |
| H        | -5.010259        | 3.928101         | -4.907079        |
| C        | -0.962262        | 4.032908         | -0.390035        |
| H        | -1.059129        | 4.267002         | -1.45658         |
| H        | -1.44482         | 4.835116         | 0.187756         |
| H        | -1.501848        | 3.094481         | -0.210135        |
| C        | -4.299651        | -2.139889        | -2.66448         |
| C        | -2.202913        | 3.422479         | -4.116843        |
| C        | 2.183265         | 2.081029         | -2.771259        |
| H        | 2.643059         | 2.144913         | -3.755106        |
| C        | -2.963829        | 5.730658         | -2.689177        |
| H        | -3.240228        | 6.627936         | -2.130029        |
| C        | 1.62791          | 3.126843         | -2.12131         |
| H        | 1.572019         | 4.135503         | -2.521682        |
| C        | -1.4957          | 4.625074         | -4.255366        |
| H        | -0.634075        | 4.671036         | -4.922768        |
| C        | 2.692407         | -0.345397        | -2.723055        |
| C        | 4.154882         | -0.099398        | -3.141539        |
| H        | 4.250632         | 0.720085         | -3.868735        |

[Type text]

|   |           |           |           |
|---|-----------|-----------|-----------|
| H | 4.568357  | -1.006986 | -3.608394 |
| H | 4.766372  | 0.147392  | -2.260689 |
| C | -4.87217  | 4.540427  | -1.527696 |
| H | -5.457567 | 3.630067  | -1.712159 |
| C | -6.017734 | 0.914728  | -3.82447  |
| H | -6.951571 | 1.016853  | -4.376606 |
| C | -3.199024 | -2.01053  | -4.97677  |
| H | -3.696771 | -1.030478 | -4.973623 |
| C | -5.686229 | -0.400981 | -3.451282 |
| C | 0.668333  | 3.558346  | 1.476112  |
| H | 0.120709  | 2.650854  | 1.753682  |
| H | 0.279598  | 4.388922  | 2.085625  |
| H | 1.723531  | 3.39978   | 1.731776  |
| C | -6.621031 | -1.486323 | -3.947869 |
| H | -6.155756 | -2.022252 | -4.789133 |
| H | -7.571747 | -1.060595 | -4.293595 |
| H | -6.819347 | -2.239076 | -3.173478 |
| C | -3.694765 | -2.793608 | -3.7641   |
| C | -4.650353 | -2.842425 | -1.486873 |
| C | -4.389038 | 4.456921  | -0.07138  |
| H | -3.76971  | 3.565498  | 0.090454  |
| H | -5.247491 | 4.409612  | 0.618872  |
| H | -3.785017 | 5.338799  | 0.195675  |
| C | -3.516236 | -4.181844 | -3.697572 |
| H | -3.04935  | -4.706552 | -4.534608 |
| C | -4.467601 | -4.233316 | -1.477963 |
| H | -4.74513  | -4.807815 | -0.59357  |
| C | -3.922865 | -4.902188 | -2.575213 |
| H | -3.783434 | -5.98601  | -2.538751 |
| C | -1.875974 | 5.774248  | -3.559193 |
| H | -1.31134  | 6.701951  | -3.686284 |
| C | 2.685092  | -1.522419 | -1.745872 |
| H | 3.279028  | -1.295616 | -0.84816  |
| H | 3.103079  | -2.416638 | -2.231243 |
| H | 1.668425  | -1.75978  | -1.415361 |
| C | -2.747875 | 1.935601  | -6.117456 |
| H | -3.789999 | 1.788399  | -5.807842 |
| H | -2.435282 | 1.030746  | -6.663925 |
| H | -2.711861 | 2.784912  | -6.819567 |
| C | 1.232152  | 5.232005  | -0.26589  |
| H | 2.317917  | 5.124406  | -0.133583 |
| H | 0.869809  | 5.977773  | 0.457684  |
| H | 1.029817  | 5.632136  | -1.270278 |



[Type text]

|    |           |           |           |
|----|-----------|-----------|-----------|
| C  | -5.811865 | 5.742289  | -1.715124 |
| H  | -5.330471 | 6.684168  | -1.405858 |
| H  | -6.716239 | 5.621154  | -1.097158 |
| H  | -6.123756 | 5.858553  | -2.764462 |
| C  | 1.843961  | -0.708576 | -3.957943 |
| H  | 0.803691  | -0.894502 | -3.657547 |
| H  | 2.23534   | -1.612511 | -4.451529 |
| H  | 1.843907  | 0.110416  | -4.693094 |
| C  | -0.353674 | 2.197543  | -5.40431  |
| H  | -0.190184 | 2.952164  | -6.191362 |
| H  | -0.097559 | 1.217143  | -5.835408 |
| H  | 0.339111  | 2.395251  | -4.57433  |
| C  | -5.18594  | -2.107664 | -0.255624 |
| H  | -4.550769 | -1.211405 | -0.134509 |
| C  | -6.640937 | -1.626034 | -0.404806 |
| H  | -6.757499 | -0.870902 | -1.192018 |
| H  | -6.982797 | -1.171924 | 0.539733  |
| H  | -7.310721 | -2.473093 | -0.628542 |
| C  | -3.531053 | -2.681806 | -6.316786 |
| H  | -2.972129 | -3.621753 | -6.453633 |
| H  | -3.258648 | -2.016781 | -7.152241 |
| H  | -4.604704 | -2.914385 | -6.401101 |
| C  | -5.057409 | -2.932937 | 1.027547  |
| H  | -5.762771 | -3.780882 | 1.03126   |
| H  | -5.296512 | -2.310764 | 1.902046  |
| H  | -4.039306 | -3.316304 | 1.166954  |
| As | 1.107024  | -0.000512 | 1.299721  |
| Si | -0.998252 | -1.071167 | 0.742326  |
| N  | -1.131728 | -2.820993 | 0.840429  |
| N  | -2.148103 | -0.863359 | 2.064428  |
| C  | -0.51639  | -3.890047 | 0.014725  |
| C  | 0.962262  | -4.032908 | 0.390035  |
| H  | 1.059129  | -4.267002 | 1.45658   |
| H  | 1.44482   | -4.835116 | -0.187756 |
| H  | 1.501848  | -3.094481 | 0.210135  |
| C  | -2.183265 | -2.081029 | 2.771259  |
| H  | -2.643059 | -2.144913 | 3.755106  |
| C  | -1.62791  | -3.126843 | 2.12131   |
| H  | -1.572019 | -4.135503 | 2.521682  |
| C  | -2.692407 | 0.345397  | 2.723055  |
| C  | -4.154882 | 0.099398  | 3.141539  |
| H  | -4.250632 | -0.720085 | 3.868735  |
| H  | -4.568357 | 1.006986  | 3.608394  |

[Type text]

|    |           |           |           |
|----|-----------|-----------|-----------|
| H  | -4.766372 | -0.147392 | 2.260689  |
| C  | -0.668333 | -3.558346 | -1.476112 |
| H  | -0.120709 | -2.650854 | -1.753682 |
| H  | -0.279598 | -4.388922 | -2.085625 |
| H  | -1.723531 | -3.39978  | -1.731776 |
| C  | -2.685092 | 1.522419  | 1.745872  |
| H  | -3.279028 | 1.295616  | 0.84816   |
| H  | -3.103079 | 2.416638  | 2.231243  |
| H  | -1.668425 | 1.75978   | 1.415361  |
| C  | -1.232152 | -5.232005 | 0.26589   |
| H  | -2.317917 | -5.124406 | 0.133583  |
| H  | -0.869809 | -5.977773 | -0.457684 |
| H  | -1.029817 | -5.632136 | 1.270278  |
| C  | -1.843961 | 0.708576  | 3.957943  |
| H  | -0.803691 | 0.894502  | 3.657547  |
| H  | -2.23534  | 1.612511  | 4.451529  |
| H  | -1.843907 | -0.110416 | 4.693094  |
| Zn | 3.235346  | -0.611532 | 2.175306  |
| N  | 4.589061  | 0.742313  | 2.768733  |
| N  | 4.065519  | -2.186391 | 3.119695  |
| C  | 3.317555  | -3.40058  | 3.237425  |
| C  | 3.699037  | -4.551167 | 2.505528  |
| C  | 1.807718  | -2.184377 | 4.923976  |
| H  | 1.898259  | -1.313209 | 4.252924  |
| C  | 5.235026  | -2.083858 | 3.761121  |
| C  | 1.689856  | 1.743102  | 4.849942  |
| H  | 1.461305  | 1.225275  | 3.906968  |
| H  | 1.325056  | 1.122875  | 5.685339  |
| H  | 1.122515  | 2.688209  | 4.850367  |
| C  | 5.799185  | -3.271061 | 4.521941  |
| H  | 6.437964  | -3.875231 | 3.858766  |
| H  | 6.42046   | -2.92848  | 5.359944  |
| H  | 5.010259  | -3.928101 | 4.907079  |
| C  | 4.299651  | 2.139889  | 2.66448   |
| C  | 2.202913  | -3.422479 | 4.116843  |
| C  | 2.963829  | -5.730658 | 2.689177  |
| H  | 3.240228  | -6.627936 | 2.130029  |
| C  | 1.4957    | -4.625074 | 4.255366  |
| H  | 0.634075  | -4.671036 | 4.922768  |
| C  | 4.87217   | -4.540427 | 1.527696  |
| H  | 5.457567  | -3.630067 | 1.712159  |
| C  | 6.017734  | -0.914728 | 3.82447   |
| H  | 6.951571  | -1.016853 | 4.376606  |

[Type text]

|   |           |           |           |
|---|-----------|-----------|-----------|
| C | 3.199024  | 2.01053   | 4.97677   |
| H | 3.696771  | 1.030478  | 4.973623  |
| C | 5.686229  | 0.400981  | 3.451282  |
| C | 6.621031  | 1.486323  | 3.947869  |
| H | 6.155756  | 2.022252  | 4.789133  |
| H | 7.571747  | 1.060595  | 4.293595  |
| H | 6.819347  | 2.239076  | 3.173478  |
| C | 3.694765  | 2.793608  | 3.7641    |
| C | 4.650353  | 2.842425  | 1.486873  |
| C | 4.389038  | -4.456921 | 0.07138   |
| H | 3.76971   | -3.565498 | -0.090454 |
| H | 5.247491  | -4.409612 | -0.618872 |
| H | 3.785017  | -5.338799 | -0.195675 |
| C | 3.516236  | 4.181844  | 3.697572  |
| H | 3.04935   | 4.706552  | 4.534608  |
| C | 4.467601  | 4.233316  | 1.477963  |
| H | 4.74513   | 4.807815  | 0.59357   |
| C | 3.922865  | 4.902188  | 2.575213  |
| H | 3.783434  | 5.98601   | 2.538751  |
| C | 1.875974  | -5.774248 | 3.559193  |
| H | 1.31134   | -6.701951 | 3.686284  |
| C | 2.747875  | -1.935601 | 6.117456  |
| H | 3.789999  | -1.788399 | 5.807842  |
| H | 2.435282  | -1.030746 | 6.663925  |
| H | 2.711861  | -2.784912 | 6.819567  |
| C | 5.811865  | -5.742289 | 1.715124  |
| H | 5.330471  | -6.684168 | 1.405858  |
| H | 6.716239  | -5.621154 | 1.097158  |
| H | 6.123756  | -5.858553 | 2.764462  |
| C | 0.353674  | -2.197543 | 5.40431   |
| H | 0.190184  | -2.952164 | 6.191362  |
| H | 0.097559  | -1.217143 | 5.835408  |
| H | -0.339111 | -2.395251 | 4.57433   |
| C | 5.18594   | 2.107664  | 0.255624  |
| H | 4.550769  | 1.211405  | 0.134509  |
| C | 6.640937  | 1.626034  | 0.404806  |
| H | 6.757499  | 0.870902  | 1.192018  |
| H | 6.982797  | 1.171924  | -0.539733 |
| H | 7.310721  | 2.473093  | 0.628542  |
| C | 3.531053  | 2.681806  | 6.316786  |
| H | 2.972129  | 3.621753  | 6.453633  |
| H | 3.258648  | 2.016781  | 7.152241  |
| H | 4.604704  | 2.914385  | 6.401101  |

[Type text]

|   |          |          |           |
|---|----------|----------|-----------|
| C | 5.057409 | 2.932937 | -1.027547 |
| H | 5.762771 | 3.780882 | -1.03126  |
| H | 5.296512 | 2.310764 | -1.902046 |
| H | 4.039306 | 3.316304 | -1.166954 |

**Table S8.** Cartesian geometry of **7** in Angstrom [Å].

| Atomtype | X<br>coordinates | Y<br>coordinates | Z<br>coordinates |
|----------|------------------|------------------|------------------|
| As       | -0.358526        | -0.219692        | -1.677071        |
| Zn       | 1.4439           | 0.057121         | -0.131666        |
| Si       | -1.851806        | -0.093752        | -0.10569         |
| N        | 2.319138         | 1.320431         | 1.151881         |
| C        | 4.059015         | 1.931554         | 2.781222         |
| H        | 4.364462         | 2.868781         | 2.291858         |
| H        | 4.935268         | 1.494853         | 3.276215         |
| H        | 3.319395         | 2.209846         | 3.544609         |
| N        | 3.020927         | -1.184266        | -0.35576         |
| C        | 3.458985         | 0.972297         | 1.772006         |
| N        | -3.265866        | 0.912361         | 0.026384         |
| C        | 4.183748         | -0.208865        | 1.532973         |
| H        | 5.058493         | -0.348099        | 2.166123         |
| N        | -2.310581        | -0.967855        | 1.334642         |
| C        | 4.045834         | -1.156983        | 0.489639         |
| C        | 5.164804         | -2.167556        | 0.338763         |
| H        | 4.794324         | -3.184768        | 0.531738         |
| H        | 5.992782         | -1.958593        | 1.027678         |
| H        | 5.548409         | -2.169594        | -0.692294        |
| C        | -3.459414        | -0.394344        | 1.914148         |
| H        | -3.831776        | -0.780997        | 2.861268         |
| C        | -3.979901        | 0.629352         | 1.198336         |
| H        | -4.853506        | 1.225825         | 1.45645          |
| C        | 1.924642         | 2.701952         | 1.21607          |
| C        | 1.033997         | 3.180566         | 2.206221         |
| C        | 0.736029         | 4.551191         | 2.239208         |
| H        | 0.049997         | 4.928064         | 3.001189         |
| C        | 1.305101         | 5.442886         | 1.33416          |
| H        | 1.066528         | 6.508037         | 1.384798         |
| C        | 2.166886         | 4.959695         | 0.352014         |
| H        | 2.597653         | 5.654742         | -0.372704        |
| C        | 2.479913         | 3.596852         | 0.264887         |
| C        | 3.394404         | 3.121725         | -0.859006        |
| H        | 3.548402         | 2.040903         | -0.739271        |

[Type text]

|   |           |           |           |
|---|-----------|-----------|-----------|
| C | 2.72737   | 3.338921  | -2.227064 |
| H | 1.778443  | 2.785282  | -2.297392 |
| H | 3.387354  | 2.995421  | -3.037302 |
| H | 2.508103  | 4.40402   | -2.404217 |
| C | 4.78115   | 3.782663  | -0.796768 |
| H | 4.719194  | 4.873654  | -0.939747 |
| H | 5.436235  | 3.381203  | -1.586268 |
| H | 5.271296  | 3.598596  | 0.172149  |
| C | 0.406639  | 2.270221  | 3.253486  |
| H | 0.850244  | 1.274099  | 3.124093  |
| C | 0.711888  | 2.737377  | 4.687732  |
| H | 1.793291  | 2.846147  | 4.862991  |
| H | 0.31999   | 2.015621  | 5.421501  |
| H | 0.242763  | 3.710056  | 4.904928  |
| C | -1.11038  | 2.143167  | 3.042419  |
| H | -1.607498 | 3.124427  | 3.100618  |
| H | -1.563627 | 1.488676  | 3.801524  |
| H | -1.341618 | 1.7181    | 2.056378  |
| C | 3.028385  | -2.098717 | -1.458466 |
| C | 2.663294  | -3.451908 | -1.270053 |
| C | 2.719896  | -4.321861 | -2.36774  |
| H | 2.44088   | -5.369616 | -2.235091 |
| C | 3.104339  | -3.870911 | -3.627001 |
| H | 3.148504  | -4.564057 | -4.470966 |
| C | 3.400598  | -2.52143  | -3.81409  |
| H | 3.663529  | -2.172847 | -4.813296 |
| C | 3.356495  | -1.610853 | -2.749262 |
| C | 3.647637  | -0.131004 | -2.983253 |
| H | 2.97376   | 0.435754  | -2.319951 |
| C | 3.340332  | 0.324939  | -4.415659 |
| H | 4.056586  | -0.091289 | -5.142388 |
| H | 3.408918  | 1.420209  | -4.489184 |
| H | 2.326526  | 0.027475  | -4.724251 |
| C | 5.087446  | 0.245523  | -2.592974 |
| H | 5.278977  | 0.079287  | -1.523996 |
| H | 5.280364  | 1.309773  | -2.801407 |
| H | 5.813688  | -0.349747 | -3.170489 |
| C | 2.108349  | -3.958616 | 0.053288  |
| H | 2.314909  | -3.203497 | 0.823739  |
| C | 2.738683  | -5.276634 | 0.528261  |
| H | 2.362312  | -5.535744 | 1.531103  |
| H | 3.837562  | -5.214542 | 0.581096  |
| H | 2.486177  | -6.115937 | -0.13955  |

[Type text]

|   |           |           |           |
|---|-----------|-----------|-----------|
| C | 0.580869  | -4.088192 | -0.057423 |
| H | 0.122591  | -3.129422 | -0.341743 |
| H | 0.145876  | -4.409517 | 0.89737   |
| H | 0.308496  | -4.830729 | -0.825378 |
| C | -3.845152 | 1.768935  | -0.972778 |
| C | -4.919873 | 1.266564  | -1.749821 |
| C | -5.506256 | 2.113265  | -2.698923 |
| H | -6.330826 | 1.743929  | -3.311864 |
| C | -5.044264 | 3.415995  | -2.886224 |
| H | -5.513657 | 4.061637  | -3.633083 |
| C | -3.977656 | 3.886598  | -2.12616  |
| H | -3.611543 | 4.903774  | -2.283924 |
| C | -3.358022 | 3.08029   | -1.158666 |
| C | -2.182468 | 3.638201  | -0.371993 |
| H | -1.845904 | 2.863674  | 0.327453  |
| C | -2.586515 | 4.857588  | 0.471863  |
| H | -2.921164 | 5.696921  | -0.159647 |
| H | -1.728347 | 5.207047  | 1.065866  |
| H | -3.408377 | 4.610025  | 1.163025  |
| C | -0.998862 | 3.950943  | -1.300397 |
| H | -0.71167  | 3.055826  | -1.8723   |
| H | -0.12888  | 4.274508  | -0.713867 |
| H | -1.24675  | 4.755027  | -2.013128 |
| C | -5.384947 | -0.182707 | -1.638603 |
| H | -5.045339 | -0.581019 | -0.673082 |
| C | -6.912396 | -0.338202 | -1.656351 |
| H | -7.38875  | 0.289904  | -0.887158 |
| H | -7.187841 | -1.386911 | -1.459683 |
| H | -7.347679 | -0.066144 | -2.631429 |
| C | -4.725831 | -1.028175 | -2.743192 |
| H | -5.027297 | -0.669254 | -3.740823 |
| H | -5.02334  | -2.085137 | -2.656457 |
| H | -3.627051 | -0.976279 | -2.688602 |
| C | -1.962458 | -2.293357 | 1.775924  |
| C | -2.668526 | -3.395108 | 1.231103  |
| C | -2.466978 | -4.660635 | 1.798266  |
| H | -3.015434 | -5.517833 | 1.401014  |
| C | -1.577045 | -4.846917 | 2.855109  |
| H | -1.439149 | -5.840916 | 3.288109  |
| C | -0.843446 | -3.765249 | 3.336244  |
| H | -0.123642 | -3.919457 | 4.14359   |
| C | -1.016787 | -2.477296 | 2.807231  |
| C | -0.196193 | -1.324461 | 3.360111  |

[Type text]

|   |           |           |           |
|---|-----------|-----------|-----------|
| H | -0.470394 | -0.431423 | 2.786439  |
| C | -0.528101 | -1.050208 | 4.834942  |
| H | -1.600446 | -0.838483 | 4.970091  |
| H | 0.041297  | -0.184306 | 5.206095  |
| H | -0.274478 | -1.913311 | 5.471712  |
| C | 1.308515  | -1.553813 | 3.156067  |
| H | 1.662513  | -2.454237 | 3.682636  |
| H | 1.891775  | -0.698922 | 3.528259  |
| H | 1.550424  | -1.676401 | 2.090306  |
| C | -3.627494 | -3.251121 | 0.055303  |
| H | -3.562653 | -2.216948 | -0.309215 |
| C | -3.215318 | -4.156936 | -1.116119 |
| H | -2.182934 | -3.943162 | -1.431557 |
| H | -3.876728 | -3.991847 | -1.980824 |
| H | -3.278106 | -5.224376 | -0.849999 |
| C | -5.08732  | -3.48239  | 0.476176  |
| H | -5.243283 | -4.512054 | 0.838152  |
| H | -5.765687 | -3.318692 | -0.376925 |
| H | -5.380455 | -2.789815 | 1.280101  |

## 5. References

- 1) H. W. Roesky, *Inorg. Synth.*, 2010, **35**, 34.
- 2) S. Yao, Y. Grossheim, A. Kostenko, E. Ballester-Martínez, S. Schutte, M. Bispinghoff, H. Grützmacher and M. Driess, *Angew. Chem. Int. Ed.* 2017, **56**, 7465.
- 3) N. Kuhn and T. Kratz, *Synthesis*, 1993, 561.
- 4) M. Denk, R. Lennon, R. Hayashi, R. West, A. V. Belyakov, H. P. Verne, A. Haaland, M. Wagner and N. Metzler, *J. Am. Chem. Soc.*, 1994, **116**, 2691.
- 5) P. Zark, A. Schäfer, A. Mitra, D. Haase, W. Saak, R. West and T. Müller, *J. Organomet. Chem.*, 2010, **695**, 398.
- 6) G. M. Sheldrick, *Acta Cryst.*, 2015, A71, 3-8.
- 7) G. M. Sheldrick, *Acta Cryst.*, 2015, C71, 3-8.
- 8) A. D. Becke, *J. Chem. Phys.*, 1997, **107**, 8554-8560.
- 9) S. Grimme, *J. Comput. Chem.*, 2006, **27**, 1787-1799.
- 10) F. Weigend and R. Ahlrichs, *Phys. Chem. Chem. Phys.*, 2005, **7**, 3297-3305.
- 11) S. Grimme, J. Antony, S. Ehrlich and H. Krieg, *J. Chem. Phys.*, 2010, **132**, 154104.
- 12) Gaussian 09, Revision D.01, M. J. Frisch, G. W. Trucks, H. B. Schlegel, G. E. Scuseria, M. A. Robb, J. R. Cheeseman, G. Scalmani, V. Barone, B. Mennucci, G. A. Petersson, H. Nakatsuji, M. Caricato, X. Li, H. P. Hratchian, A. F. Izmaylov, J. Bloino, G. Zheng, J. L. Sonnenberg, M. Hada, M. Ehara, K. Toyota, R. Fukuda, J. Hasegawa, M. Ishida, T. Nakajima, Y. Honda, O. Kitao, H. Nakai, T. Vreven, J. A. Montgomery, J. E. P. Jr., F. Ogliaro, M. Bearpark, J. J. Heyd, E. Brothers, K. N. Kudin, V. N. Staroverov, R. Kobayashi, J. Normand, K. Raghavachari, A. Rendell, J. C. Burant, S. S. Iyengar, J. Tomasi, M. Cossi, N. Rega, J. M. Millam, M. Klene, J. E. Knox, J. B. Cross, V. Bakken, C. Adamo, J. Jaramillo, R. Gomperts, R. E. Stratmann, O. Yazyev, A. J. Austin, R. Cammi, C. Pomelli, J. W. Ochterski, R. L. Martin, K. Morokuma, V. G. Zakrzewski, G. A. Voth, P. Salvador, J. J. Dannenberg, S. Dapprich, A. D. Daniels, Ö. Farkas, J. B. Foresman, J. V. Ortiz, J. Cioslowski; D. J. Fox, Gaussian, Inc., Wallingford CT, 2009.
